# Supplementary material for: Optically active cofacial ABCD-Pt(ii)–porphyrin dimer exhibits bright circularly polarized phosphorescence
Source: Royal Society of Chemistry journal article supplement (doi:10.1039/d4cc05684a), 2024-12-11
Supplement: d4cc05684a1.pdf [file d4cc05684a1.pdf]

*Supporting Information*

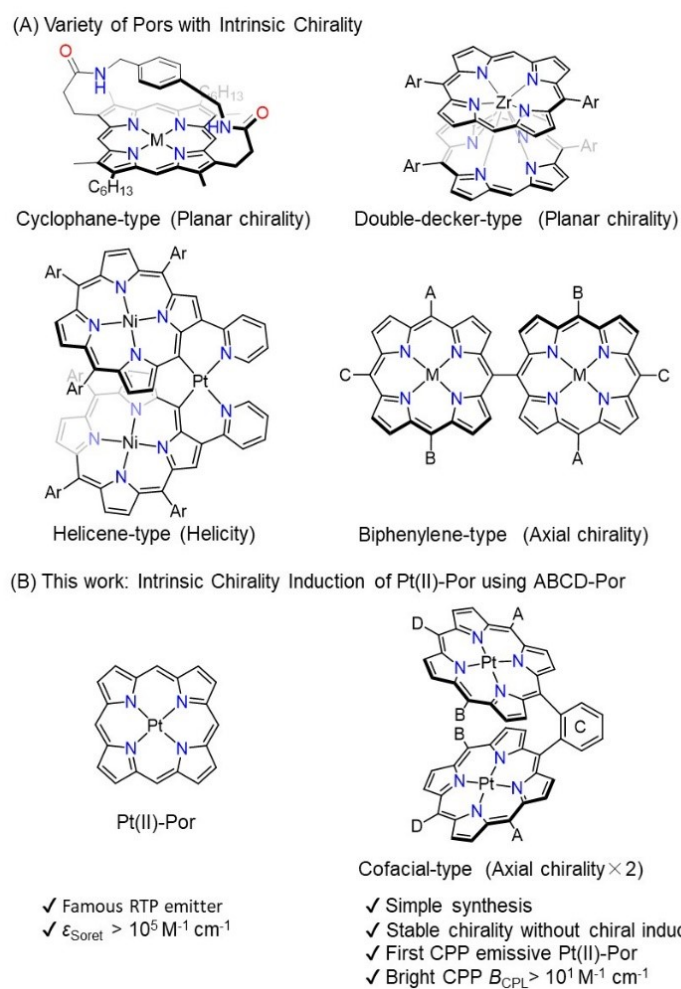

**Figure S1.** (A) Optically active Pors with intrinsic chirality. (B) This work: chirality induction of cofacial Pt(II)-Por dimer using ABCD substituents.

$$B_{CPL} \text{ values} = 0.5 \times \epsilon_{\max} \times \Phi_{\text{phos}} \times g_{\text{phos}}$$

### Our group

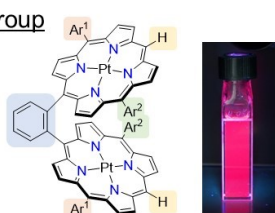

**anti-1**  
 $14.5 \text{ M}^{-1} \text{ cm}^{-1}$   
 $|g_{\text{phos}}| = 1.0 \times 10^{-3}$   
 $\epsilon_{\max} > 10^5$  (Soret)

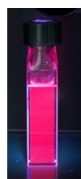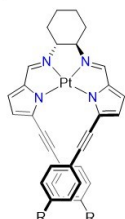

**6H, 6CF<sub>3</sub>, 6NMe<sub>2</sub>**  
 $2.1 \sim 3.3 \text{ M}^{-1} \text{ cm}^{-1}$   
 $|g_{\text{phos}}| = 2.5 \sim 3.2 \times 10^{-3}$   
*Chem. Mater.* **2022**

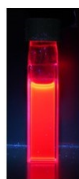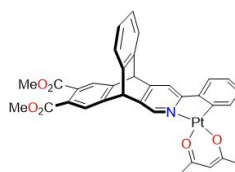

**7**  
 $1.0 \text{ M}^{-1} \text{ cm}^{-1}$   
 $|g_{\text{phos}}| = 1.3 \times 10^{-4}$   
*Chem. Commun.* **2023**

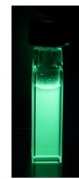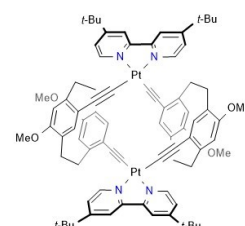

**8**  
 $< 0.04 \text{ M}^{-1} \text{ cm}^{-1}$   
 $|g_{\text{phos}}| = 1.0 \times 10^{-3}$   
*Chem. Commun.* **2020**

### Other groups

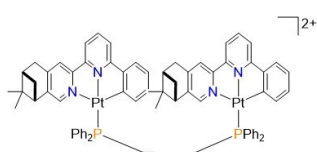

**9**  
 $22.2 \text{ M}^{-1} \text{ cm}^{-1}$   
 $|g_{\text{phos}}| = 4.0 \times 10^{-3}$   
*Dalton Trans.* **2018**, 47, 10179

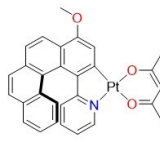

**10**  
 $9.2 \text{ M}^{-1} \text{ cm}^{-1}$   
 $|g_{\text{phos}}| = 3.0 \times 10^{-3}$   
*Chem. Sci.*, **2014**, 5, 1915.  
*ChemistryOpen*, **2022**, 11, e2022000

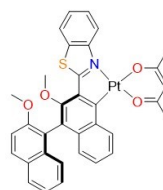

**11**  
 $8.7 \text{ M}^{-1} \text{ cm}^{-1}$   
 $|g_{\text{phos}}| = 1.3 \times 10^{-3}$   
*ACS Appl. Mater. Interfaces* **2020**, 12, 9520

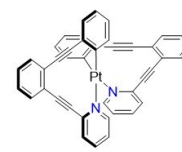

**12**  
 $2.2 \text{ M}^{-1} \text{ cm}^{-1}$   
 $|g_{\text{phos}}| = 1.0 \times 10^{-3}$   
*J. Am. Chem. Soc.*, **2017**, 139, 6863

| Compound                                        | $\epsilon_{\max}$ [ $\text{M}^{-1}\text{cm}^{-1}$ ] ( $\lambda$ [nm]) | $\Phi_{\text{phos}}$ | $ g_{\text{phos}} $  | $B_{\text{CPP}}$ [ $\text{M}^{-1}\text{cm}^{-1}$ ] | reference |
|-------------------------------------------------|-----------------------------------------------------------------------|----------------------|----------------------|----------------------------------------------------|-----------|
| <b>anti-1</b>                                   | $4.1 \times 10^5$ (387)                                               | 0.07                 | $1.0 \times 10^{-3}$ | 14.5                                               | This work |
| <b>6H</b> (R = H)                               | $4.9 \times 10^4$ (351)                                               | 0.05                 | $2.6 \times 10^{-3}$ | 3.2                                                | 42        |
| <b>6CF<sub>3</sub></b> (R = CF <sub>3</sub> )   | $4.3 \times 10^4$ (348)                                               | 0.04                 | $2.5 \times 10^{-3}$ | 2.1                                                | 42        |
| <b>6NMe<sub>2</sub></b> (R = NMe <sub>2</sub> ) | $5.1 \times 10^4$ (309)                                               | 0.04                 | $3.2 \times 10^{-3}$ | 3.3                                                | 42        |
| <b>7</b>                                        | $3.3 \times 10^4$ (252)                                               | 0.48                 | $1.3 \times 10^{-4}$ | 1.0                                                | 43        |
| <b>8</b>                                        | $7.6 \times 10^4$ (300)                                               | < 0.001              | $1.0 \times 10^{-3}$ | < 0.04                                             | 41        |
| <b>9</b>                                        | $7.4 \times 10^4$ (around 240)                                        | 0.15                 | $4.0 \times 10^{-3}$ | 22.2                                               | 38        |
| <b>10</b>                                       | $6.1 \times 10^4$ (around 250)                                        | 0.10                 | $3.0 \times 10^{-3}$ | 9.2                                                | 35–37     |
| <b>11</b>                                       | $4.2 \times 10^4$ (around 310)                                        | 0.32                 | $1.3 \times 10^{-3}$ | 8.7                                                | 39        |
| <b>12</b>                                       | $6.4 \times 10^4$ (around 300)                                        | 0.07                 | $1.0 \times 10^{-3}$ | 2.2                                                | 40        |

**Figure S2.** Selected  $B_{\text{CPP}}$  and  $|g_{\text{phos}}|$  values of optically active Pt(II) complexes. For fair comparison without artificial error, the  $\epsilon_{\max}$  was used to calculate the  $B_{\text{CPP}}$  value. In this equation, the  $B_{\text{CPP}}$  value of all compounds should be fairly maximized without any artificial error.

## General

$^1\text{H}$  and  $^{13}\text{C}$  spectra were recorded on a JEOL ECZ-500R instrument at 500 and 125 MHz, respectively. Samples were analyzed by  $\text{CDCl}_3$ , and the chemical shift values were expressed relative to  $\text{Me}_4\text{Si}$  as an internal standard. Analytical thin layer chromatography (TLC) was performed with silica gel 60 Merck F<sub>254</sub> plates or silica gel 60 NH<sub>2</sub> F<sub>254S</sub> plates. Column chromatography was performed with Wakogel C-300 SiO<sub>2</sub>. Recyclable high-performance liquid chromatography (HPLC) was carried out on a YMC LC Forte/R. In addition, HRMS were obtained on a Bruker Daltonics microTOF II spectrometer (ESI) by using sodium formate as internal reviews. Processing and analysis of MS experimental data and generation of simulated MS spectra were carried out using Compass DataAnalysis version 4.0 SP 1 (Bruker Daltonics). The PL lifetime measurement was performed on a Hamamatsu Photonics Quantaaurus-Tau fluorescence lifetime spectra meter system. UV-vis and Circular dichroism (CD) spectra were recorded on a JASCO J-1500 spectropolarimeter at room temperature. Photoluminescence (PL) and circularly polarized luminescence (CPL) spectra were recorded on a JASCO CPL-200 at room temperature. Absolute PL quantum efficiency was calculated on a JASCO FP-8500 with an ILF-835 integrating sphere.

## Materials

Commercially available compounds used without purification.

$\text{NaO}^t\text{Bu}$ , pyridine, 1,4-dioxane (dehydrated), phenylboronic acid, 1,2-benzenediboronic acid bis(pinacol) ester,  $\text{Pd}(\text{PPh}_3)_4$ ,  $\text{K}_3\text{PO}_4$ ,  $\text{Na}_3\text{PO}_4$ ,  $\text{Na}_2\text{CO}_3$ ,  $\text{Cs}_2\text{CO}_3$

Compounds prepared as described in the literature:

mono-dipyrinatoPt(II)Cl(COE) **2**:

[31] R. Inoue, M. Yokoyama, I. Maruyama, Y. Morisaki, *Chem. Eur. J.*, **2023**, 29, e202301717.

Bisformyl(meso-aryl)dipyrromethene **3**:

[44] S. Guski, M. Albrecht, T. Willms, M. Albrecht, T. Nabeshima, F. Pan, R. Puttreddy, K. Rissanen, *Chem. Commun.*, **2017**, 53, 3213–3215.

## X-ray structure determination

Crystals of *rac-anti-1*, ( $R_a,R_a$ )-*anti-1*, and **5** were analyzed using a Rigaku MicroMax-007HFM MoK $\alpha$  rotating anode generator equipped with VariMax optics, an AFC1 goniometer, and Saturn 724+ detector. Crystal of *syn-1* was analyzed using Rigaku XtaLAB-Synergy diffractometer with a HyPix-6000HE area detector and multilayer mirror-monochromated CuK $\alpha$  radiation ( $\lambda = 1.54184 \text{ \AA}$ ; PhotonJet[Cu]). The reflection data for them was integrated, scaled and averaged using Rigaku CrysAlis<sup>PRO</sup>. The structures were solved by a direct method (SHELXT) and refined using a full-matrix least-squares method on F<sup>2</sup> for all reflections (SHELXL-2018/3). The calculations were performed on Olex2 program package. Crystallographic data are given in Table S2. CCDC-2386890 (for ( $R_a,R_a$ )-

*anti-1*), 2386891 (for *rac-anti-1*), 2386892 (for *syn-1*), and 2386893 (for **5**) contain the supplementary crystallographic data for this paper. Disordered atoms were modeled using Olex2 disorder tool. These data can be obtained free of charge from The Cambridge Crystallographic Data Centre via <https://www.ccdc.cam.ac.uk/structures/>

The authors are grateful to Professor Masako Kato and Dr Masaki Yoshida (Kwansei Gakuin University) for the scXRD analysis of *syn-1*.

For *syn-1*, multiple datasets were collected however all showed very large residuals of around 6 and -2 near the Pt atoms. Checks were made for twinning and the appropriateness of the absorption correction, however improvements were not able to be made to the refinement. The data provided confirm connectivity but no further discussion is included.

### Computational methods

Optimized geometries of ( $R_a, R_s$ )-*anti-1* in T<sub>1</sub> state was obtained by using DFT calculation with the B3LYP functional, LanL2DZ<sup>47,48</sup> basis set for Pt atoms, and 6-31G(d)<sup>49</sup> for C, H, N and O atoms included in the Gaussian 16 program package.<sup>50</sup> SOC-TD-DFT calculation was carried out by using Orca 6.0 program package,<sup>51</sup> with the SARC-DKH-SVP<sup>52</sup> basis set for Pt atoms and DKH-def2-SVP<sup>53</sup> basis set for C, H, and N atoms with DKH2 Hamiltonian.<sup>54</sup> The number of roots for singlet and triplet states were set to 181 and 180, respectively.

### References

- [47] R. Bauernschmitt, R. Ahlrichs, *Chem. Phys. Lett.* **1996**, *256*, 454–464.
- [48] P. J. Hay, W. R. Wadt, *J. Chem. Phys.*, 1985, **82**, 299–310.
- [49] (a) M. M. Francl, W. J. Pietro, W. J. Hehre, J. S. Binkley, M. S. Gordon, D. J. DeFrees, J. A. Pople, *J. Chem. Phys.* **1982**, *77*, 3654–3665; (b) P. C. Hariharan, J. A. Pople, *Theor. Chim. Acta* **1973**, *28*, 213–222; (c) T. Clark, J. Chandrasekhar, G. W. Spitznagel, P. V. R. Schleyer, *J. Comput. Chem.* **1983**, *4*, 294–301.
- [50] Gaussian 16, Revision B.01, M. J. Frisch, G. W. Trucks, H. B. Schlegel, G. E. Scuseria, M. A. Robb, J. R. Cheeseman, G. Scalmani, V. Barone, G. A. Petersson, H. Nakatsuji, X. Li, M. Caricato, A. V. Marenich, J. Bloino, B. G. Janesko, R. Gomperts, B. Mennucci, H. P. Hratchian, J. V. Ortiz, A. F. Izmaylov, J. L. Sonnenberg, D. Williams-Young, F. Ding, F. Lipparini, F. Egidi, J. Goings, B. Peng, A. Petrone, T. Henderson, D. Ranasinghe, V. G. Zakrzewski, J. Gao, N. Rega, G. Zheng, W. Liang, M. Hada, M. Ehara, K. Toyota, R. Fukuda, J. Hasegawa, M. Ishida, T. Nakajima, Y. Honda, O. Kitao, H. Nakai, T. Vreven, K. Throssell, J. A. Montgomery, Jr., J. E. Peralta, F. Ogliaro, M. J. Bearpark, J. J. Heyd, E. N. Brothers, K. N. Kudin, V. N. Staroverov, T. A. Keith, R. Kobayashi, J. Normand, K. Raghavachari, A. P. Rendell, J. C. Burant, S. S. Iyengar, J. Tomasi, M. Cossi, J. M. Millam, M. Klene, C. Adamo, R. Cammi, J. W. Ochterski, R. L. Martin, K. Morokuma, O. Farkas, J. B. Foresman, and D. J. Fox, Gaussian, Inc., Wallingford CT, 2016.

- [51] F. Neese, *Wiley Interdiscip. Rev. Comput. Mol. Sci.* **2022**, e1606.
- [52] D. A. Pantazis, X. Y. Chen, C. R. Landis and F. Neese, *J. Chem. Theory Comput.* **2008**, *4*, 908–919.
- [53] F. Weigend, R. Ahlrichs, *Phys. Chem. Chem. Phys.* **2005**, *7*, 3297–3305.
- [54] M. Douglas, N. M. Kroll, *Ann. Phys. (NY)*, **1974**, *82*, 89–155.

### Scheme S3. Synthesis of 4-OTf.

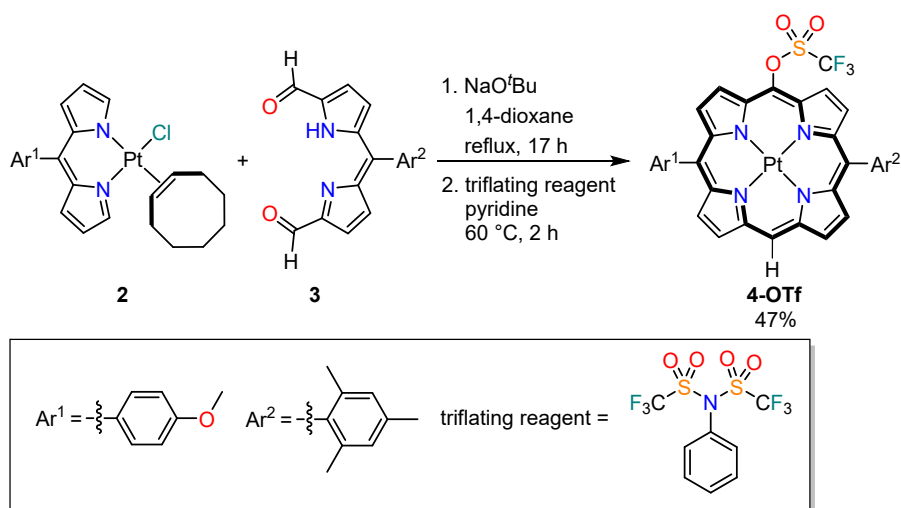

A mixture of **2** (59.0 mg, 0.10 mmol), **3** (31.8 mg, 0.10 mmol), and NaO<sup>t</sup>Bu (9.6 mg, 0.10 mmol) were dissolved in 1,4-dioxane (100 mL) under N<sub>2</sub>. After the mixture was reflux for 12 h, pyridine (5.0 mL) and *N*-phenylbis(trifluoromethanesulfonyl)imide (110.0 mg, 0.30 mmol) were added at room temperature. The mixture was stirred at 60 °C for 2 h under N<sub>2</sub> and then the solvent was evaporated. The residue was purified by column chromatography on SiO<sub>2</sub> (hexane/CH<sub>2</sub>Cl<sub>2</sub> = 7:1 to 5:1 as an eluent). Further purification was carried out by gel permeation chromatography (CH<sub>2</sub>Cl<sub>2</sub>) to afford **4-OTf** (41.3 mg, 0.047 mmol, 47%) as a red solid. The compound **4-OTf** was air and light sensitive.

$R_f = 0.21$  (hexane/CH<sub>2</sub>Cl<sub>2</sub> = 2:1 as an eluent)

<sup>1</sup>H NMR (CDCl<sub>3</sub>, 500 MHz) δ 1.84 (s, 6 H), 2.64 (s, 3 H), 4.12 (s, 3 H), 7.30 (s, 2 H), 7.31 (d,  $J = 8.6$  Hz, 2 H), 8.07 (d,  $J = 8.6$  Hz, 2 H), 8.77 (d,  $J = 4.6$  Hz, 1 H), 8.81 (d,  $J = 5.2$  Hz, 1 H), 8.94 (d,  $J = 4.6$  Hz, 1 H), 8.99 (d,  $J = 5.2$  Hz, 1 H), 9.16 (d,  $J = 4.6$  Hz, 1 H), 9.18 (d,  $J = 4.6$  Hz, 1 H), 9.43 (d,  $J = 5.2$  Hz, 1 H), 9.45 (d,  $J = 5.2$  Hz, 1 H), 10.09 (s, 1 H) ppm.

<sup>13</sup>C NMR (CDCl<sub>3</sub>, 125 MHz) δ 21.5, 21.6, 55.6, 108.5, 112.5, 119.4 (q,  $J_{\text{C-F}} = 320$  Hz), 121.2, 122.8, 126.2, 127.0, 127.4, 128.0, 130.6, 131.0, 131.5, 131.8, 132.16, 132.20, 132.8, 135.0, 136.3, 136.4, 136.7, 138.2, 139.0, 141.0 (three peaks), 141.3, 141.5, 141.8, 159.6 ppm;

IR(ATR):  $\tilde{\nu} = 3052, 3011, 2951, 2925, 2849, 1736, 1604, 1510, 1458, 1423, 1247, 1221, 1334, 1017, 950, 818, 750, 698$  cm<sup>-1</sup>.

HRMS (ESI<sup>+</sup>):  $m/z$  calcd for C<sub>37</sub>H<sub>27</sub>F<sub>3</sub>N<sub>4</sub>O<sub>4</sub><sup>195</sup>PtSNa [M+Na]<sup>+</sup>: 898.1248; found: 898.1277.

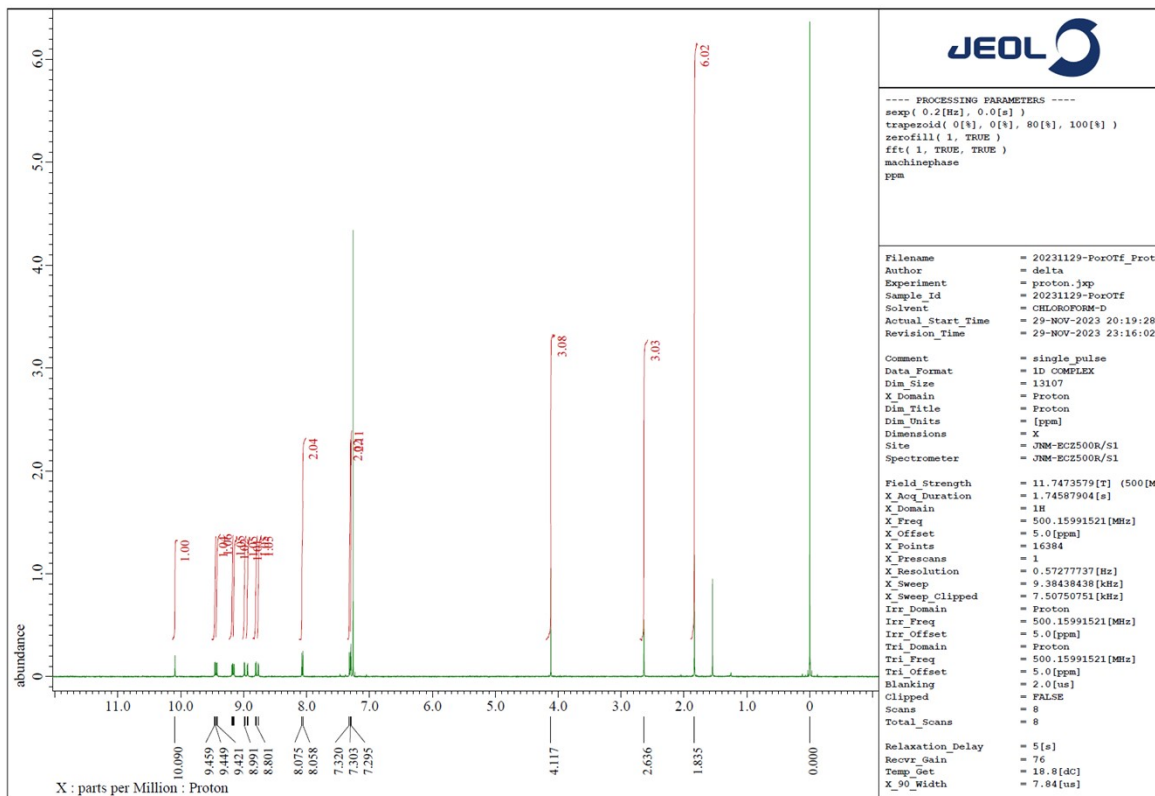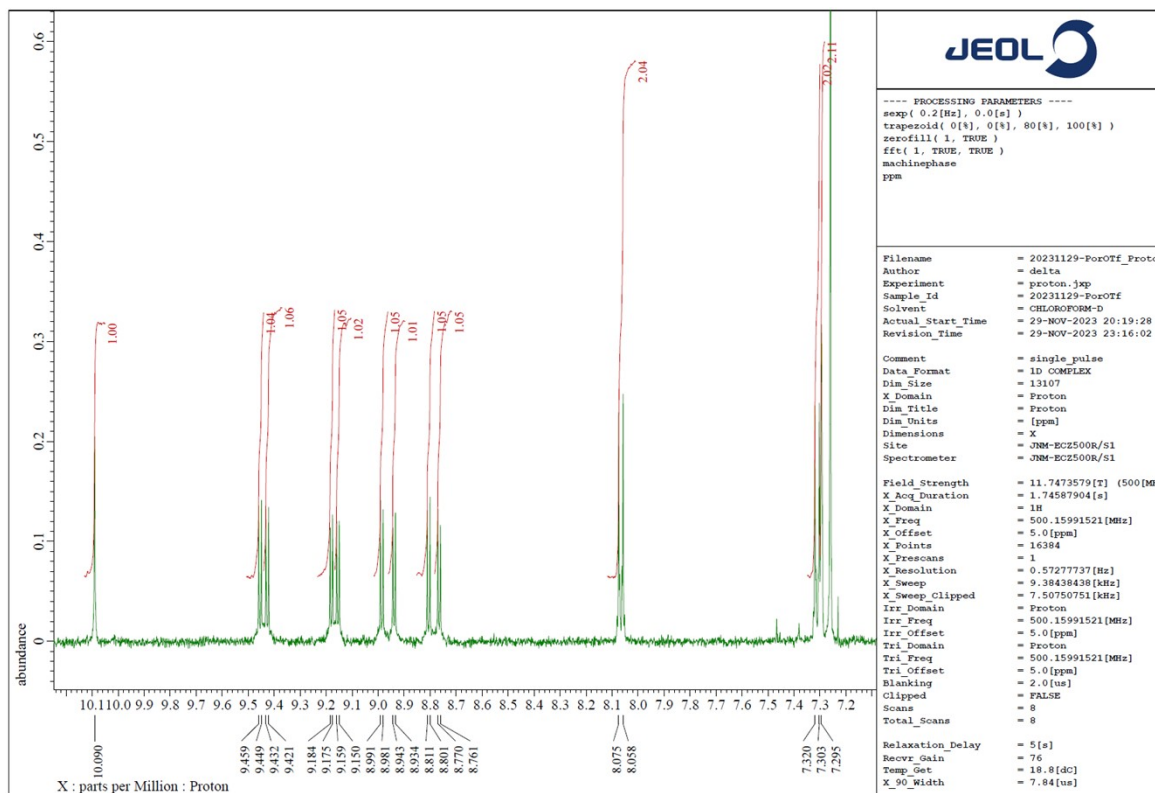

Figure S3. <sup>1</sup>H NMR spectra (CDCl<sub>3</sub>, 500 MHz) of 4-OTf.



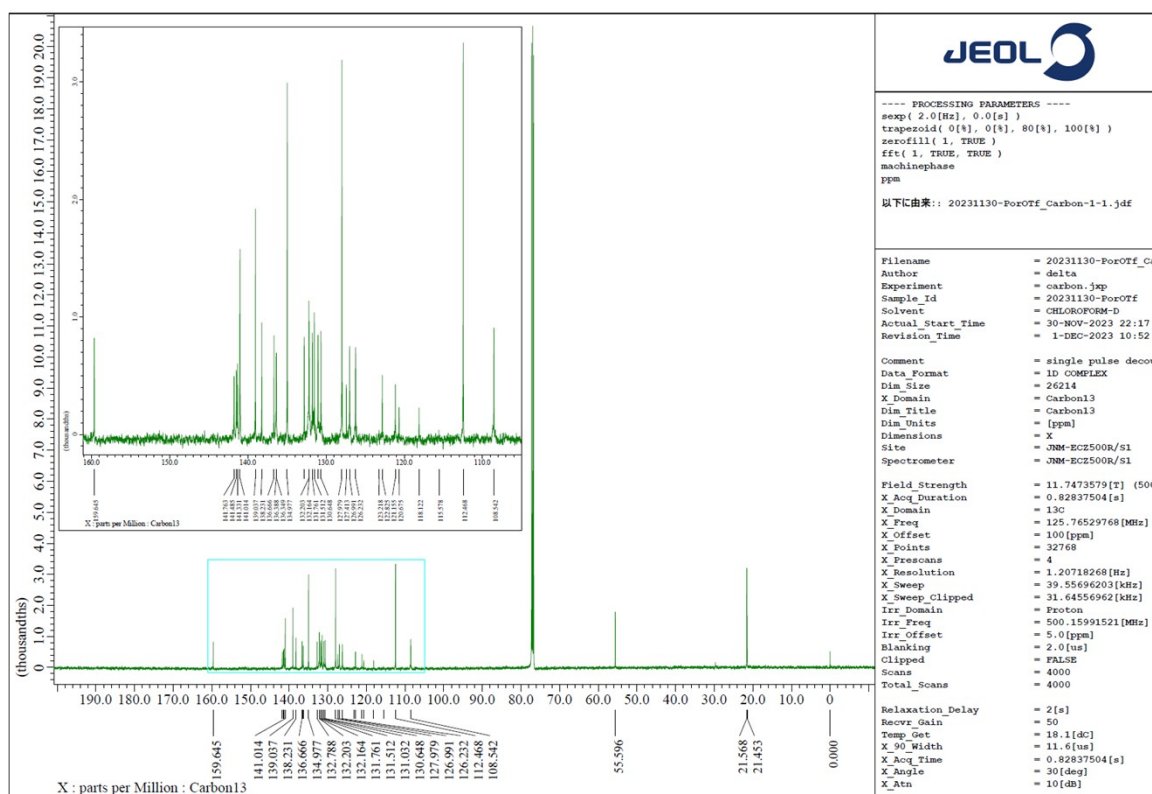

**Figure S4.**  $^{13}\text{C}\{^1\text{H}\}$  NMR spectrum ( $\text{CDCl}_3$ , 125 MHz) of **4-OTf**.

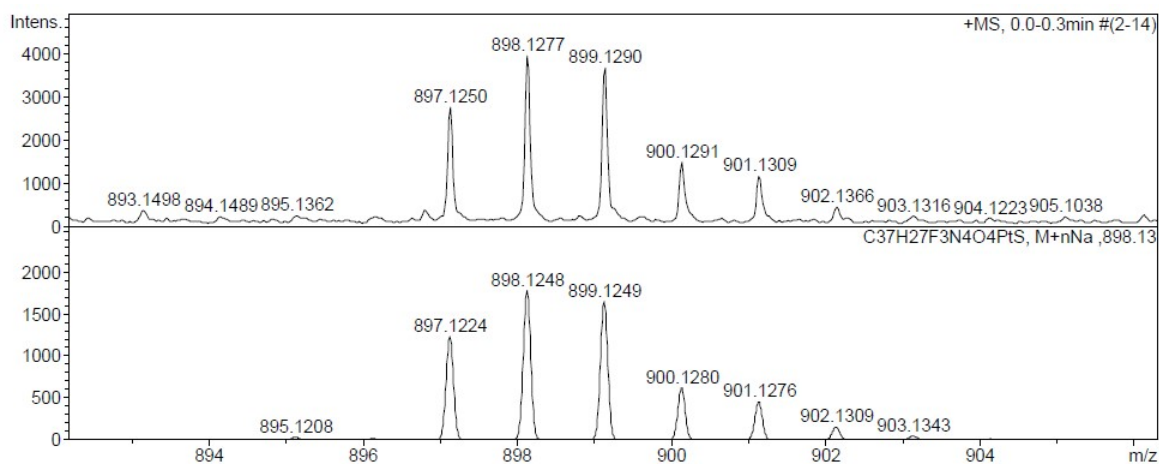

**Figure S5.** Mass spectra (ESI) and data of **4-OTf**. Top: experimental spectrum and bottom: theoretical spectrum.

**Scheme S3.** Synthesis of triaryl porphyrin **5**.

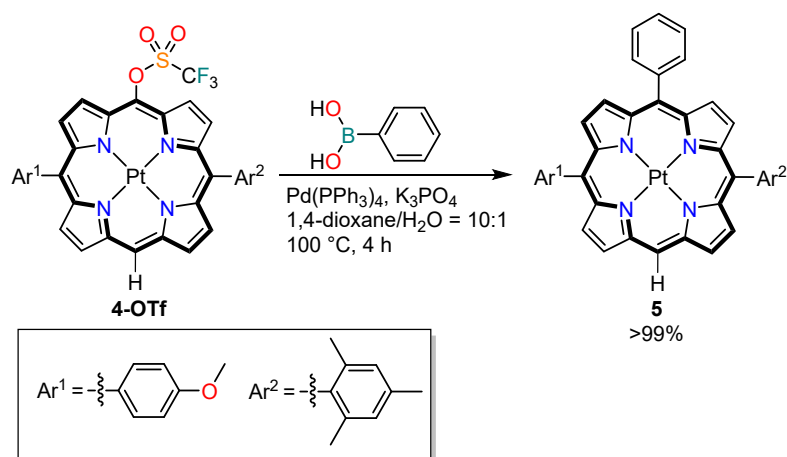

A mixture of **4-OTf** (12.3 mg, 0.014 mmol), phenyl boronic acid (3.4 mg, 0.028 mmol), Pd(PPh<sub>3</sub>)<sub>4</sub> (1.6 mg, 0.0014 mmol, 10 mol%), and K<sub>3</sub>PO<sub>4</sub> (8.9 mg, 0.42 mmol) was placed in a round bottom flask equipped with a magnetic stirring bar. After degassing the reaction mixture several times, 1,4-dioxane/H<sub>2</sub>O = 10/1 (1.0 mL) were added, and the reaction was carried out at 100 °C for 4 h with stirring. After the reaction mixture was cooled to room temperature, H<sub>2</sub>O and CH<sub>2</sub>Cl<sub>2</sub> was added to the reaction mixture. The organic layer was separated, and then aqueous layer was extracted three times with CH<sub>2</sub>Cl<sub>2</sub> and dried over MgSO<sub>4</sub>. MgSO<sub>4</sub> was removed by the filtration, and the solvent was removed by a rotary evaporator. The residue was purified by column chromatography on SiO<sub>2</sub> (CH<sub>2</sub>Cl<sub>2</sub>/hexane = 7/1 to 5/1 v/v as an eluent) to afford **5** (11.3 mg, 0.0014 mmol, >99%) as an orange solid.

$R_f$  = 0.18 (hexane/CH<sub>2</sub>Cl<sub>2</sub> = 2:1 as an eluent)

<sup>1</sup>H NMR (CDCl<sub>3</sub>, 500 MHz) δ 1.84 (s, 6 H), 2.62 (s, 3 H), 4.10 (s, 3 H), 7.28 (s, 2 H), 7.29 (d,  $J$  = 8.0 Hz, 2 H), 7.69–7.76 (m, 3 H), 8.07 (d,  $J$  = 8.0 Hz, 2 H), 8.16 (d,  $J$  = 7.5 Hz, 2 H), 8.65 (d,  $J$  = 4.6 Hz, 1H), 8.73 (d,  $J$  = 4.6 Hz, 1 H), 8.74–8.96 (m, 2 H), 8.81 (d,  $J$  = 4.6 Hz, 1 H), 8.93 (d,  $J$  = 5.2 Hz, 1 H), 9.15 (d,  $J$  = 5.2 Hz, 1H), 9.18 (d,  $J$  = 5.2 Hz, 1 H), 10.1 (s, 1 H) ppm.

<sup>13</sup>C NMR (CDCl<sub>3</sub>, 125 MHz) δ 21.46, 21.50, 55.6, 107.1, 112.3, 119.8, 121.6, 122.3, 126.7, 127.78, 127.83, 129.43, 130.1, 130.5, 130.6, 130.7, 131.2 (two peaks were overlapped), 131.3, 133.6, 133.85, 134.92, 137.4, 137.8, 139.2, 140.35, 140.41 (two peaks were overlapped), 140.60, 140.63, 140.9, 141.1, 141.5 (two peaks were overlapped), 159.4 ppm.

IR(ATR):  $\tilde{\nu}$  = 3101, 3049, 2984, 2954, 2925, 2868, 2830, 1612, 1510, 1450, 1247, 1096, 1017, 795, 746, 702 cm<sup>-1</sup>.

HRMS (ESI<sup>+</sup>):  $m/z$  calcd for C<sub>42</sub>H<sub>32</sub>N<sub>4</sub>O<sup>195</sup>PtNa [M+Na]<sup>+</sup>: 826.2119; found: 826.2121.

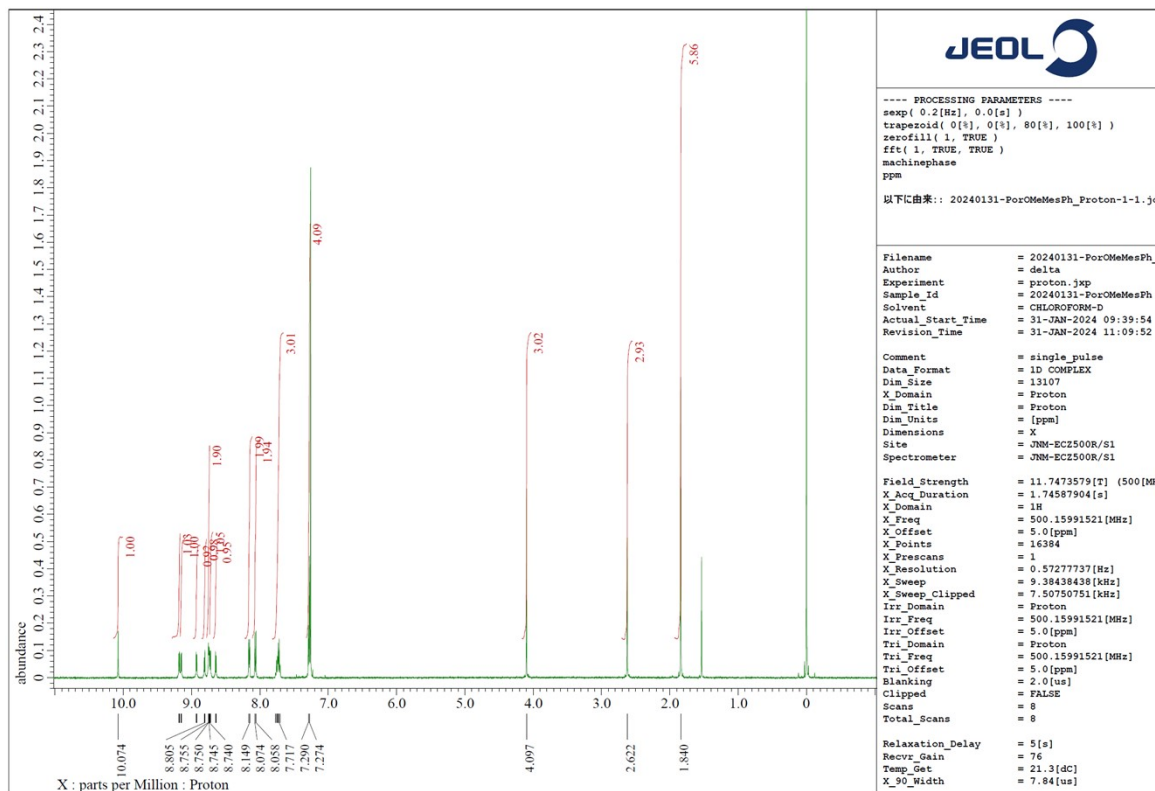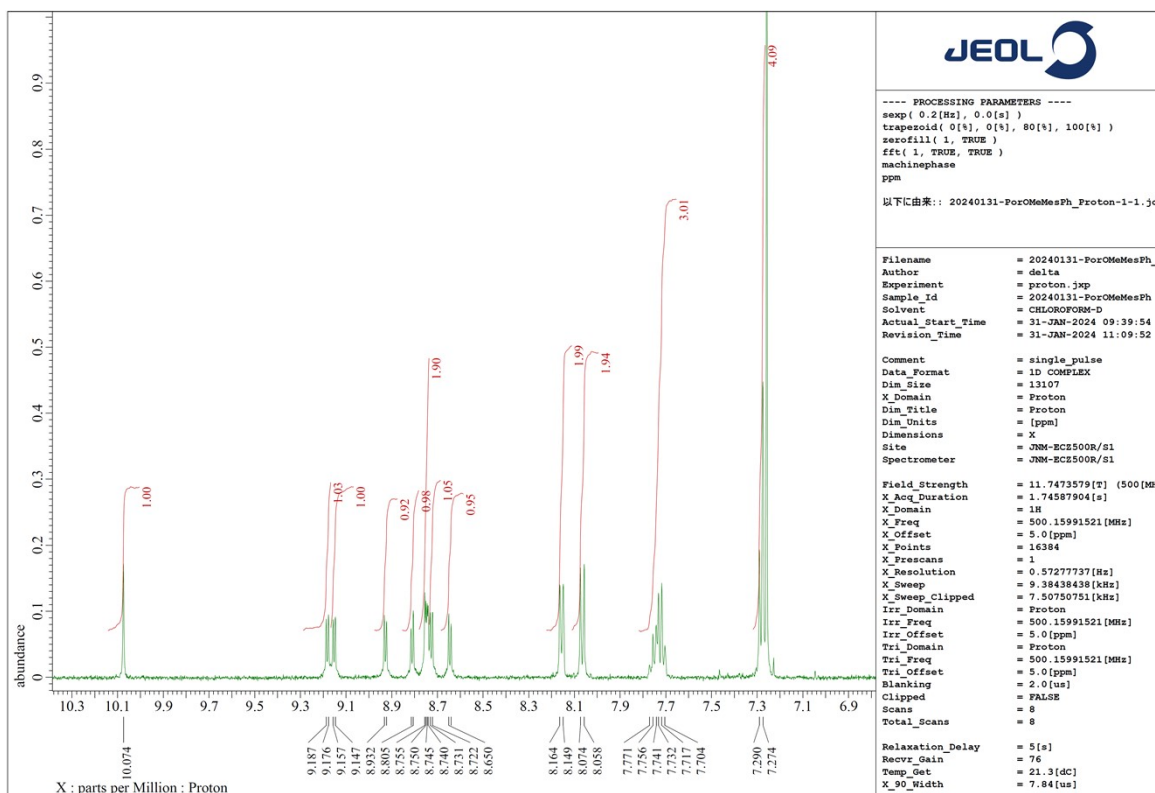

Figure S6.  $^1\text{H}$  NMR spectra ( $\text{CDCl}_3$ , 500 MHz) of **5**.

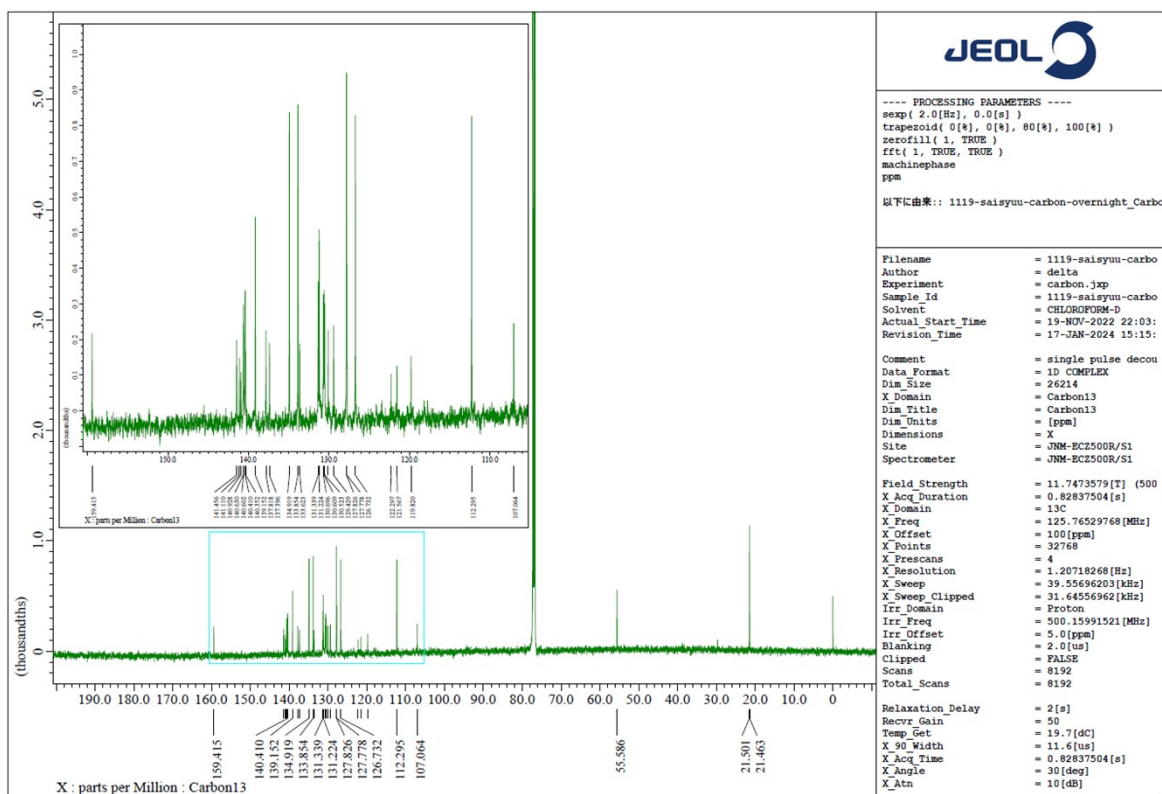

**Figure S7.**  $^{13}\text{C}\{^1\text{H}\}$  NMR spectrum ( $\text{CDCl}_3$ , 125 MHz) of **5**.

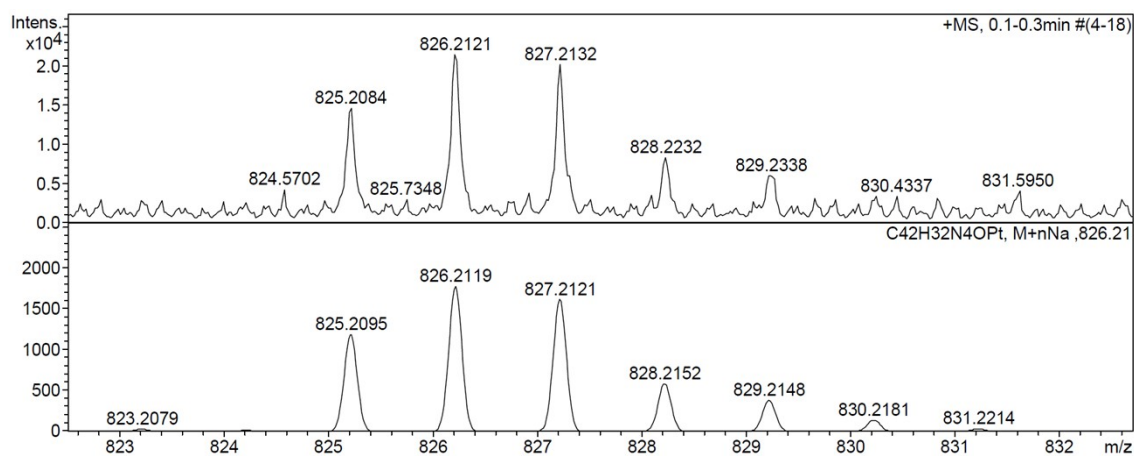

**Figure S8.** Mass spectra (ESI) and data of **5**. Top: experimental spectrum and bottom: theoretical spectrum.

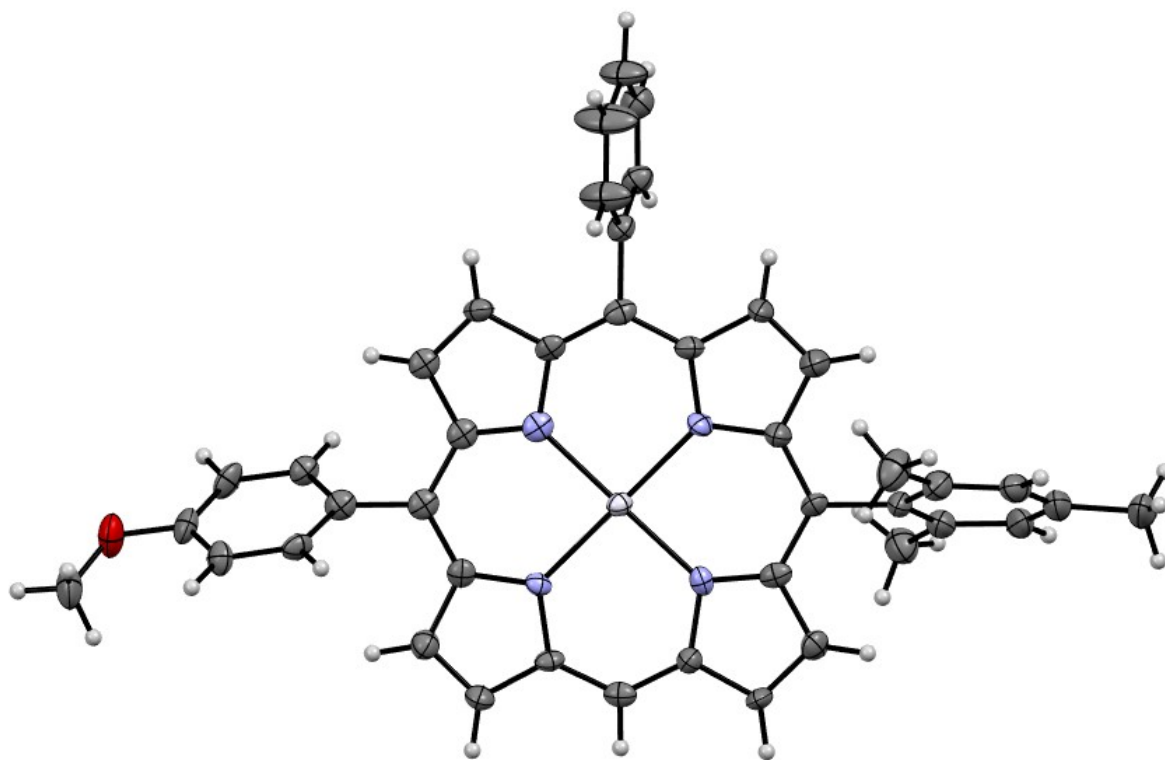

**Figure S9.** ORTEP drawing of **5** (CCDC-2386893). Thermal ellipsoids are drawn at the 50% probability level. C: gray, H: off-white, N: blue, O: red, and Pt: white.

**Table S1.** Optimization of reaction condition for synthesis of **1**.

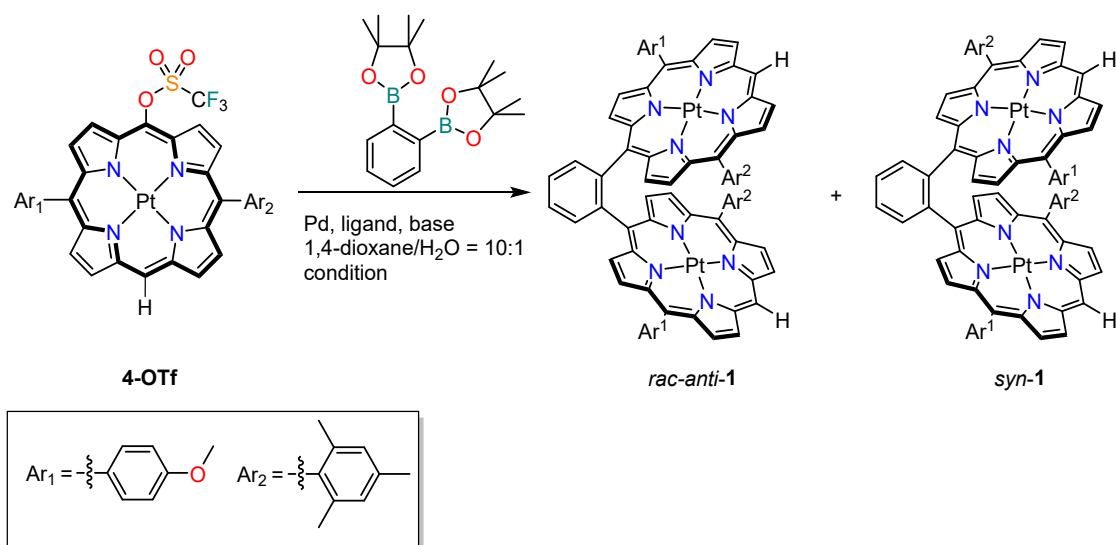

| Entry          | Pd, ligand                                                   | Base                                  | Conc.  | Condition    | NMR Yield <sup>[a]</sup> [%] |              |
|----------------|--------------------------------------------------------------|---------------------------------------|--------|--------------|------------------------------|--------------|
|                |                                                              |                                       |        |              | <i>anti-1</i>                | <i>syn-1</i> |
| 1              | Pd(PPh <sub>3</sub> ) <sub>4</sub> 20 mol%                   | K <sub>3</sub> PO <sub>4</sub> 3 eq.  | 0.01 M | 100 °C, 17 h | 10                           | 17           |
| 2              | Pd(PPh <sub>3</sub> ) <sub>4</sub> 20 mol%                   | Na <sub>3</sub> PO <sub>4</sub> 3 eq. | 0.01 M | 100 °C, 17 h | 7                            | 9            |
| 3              | Pd(PPh <sub>3</sub> ) <sub>4</sub> 20 mol%                   | Na <sub>2</sub> CO <sub>3</sub> 5 eq. | 0.01 M | 100 °C, 17 h | 7                            | 9            |
| 4              | Pd(PPh <sub>3</sub> ) <sub>4</sub> 20 mol%                   | Cs <sub>2</sub> CO <sub>3</sub> 5 eq. | 0.01 M | 100 °C, 17 h | 6                            | 8            |
| 5 <sup>b</sup> | Pd(PPh <sub>3</sub> ) <sub>4</sub> 20 mol%                   | CsF 10 eq.                            | 0.08 M | 100 °C, 7 h  | 0                            | 0            |
| 6              | Pd(PPh <sub>3</sub> ) <sub>4</sub> 4 mol%                    | K <sub>3</sub> PO <sub>4</sub> 3 eq.  | 0.01 M | 100 °C, 10 h | 2                            | 5            |
| 7              | Pd(PPh <sub>3</sub> ) <sub>4</sub> 20 mol%                   | K <sub>3</sub> PO <sub>4</sub> 3 eq.  | 0.08 M | 100 °C, 7 h  | 12                           | 10           |
| 8              | Pd <sub>2</sub> (dba) <sub>3</sub> 10 mol%,<br>SPhos 20 mol% | K <sub>3</sub> PO <sub>4</sub> 3 eq.  | 0.06 M | 100 °C, 7 h  | 0                            | 0            |
| 9              | Pd <sub>2</sub> (dba) <sub>3</sub> 10 mol%,<br>dppf 10 mol%  | K <sub>3</sub> PO <sub>4</sub> 3 eq.  | 0.04 M | 100 °C, 7 h  | 4                            | 2            |
| 10             | Pd <sub>2</sub> (dba) <sub>3</sub> 10 mol%,<br>dppm 10 mol%  | K <sub>3</sub> PO <sub>4</sub> 3 eq.  | 0.04 M | 100 °C, 7 h  | 3                            | 3            |

[a] Yield were determined by <sup>1</sup>H NMR spectra of the crude products after CH<sub>2</sub>Cl<sub>2</sub>/water extraction. [2.2]Paracyclophane was used as an internal standard. [b] Solvent: 1,4-dioxane (anhydrous)

**Scheme S4.** Synthesis of porphyrin dimer **1**.

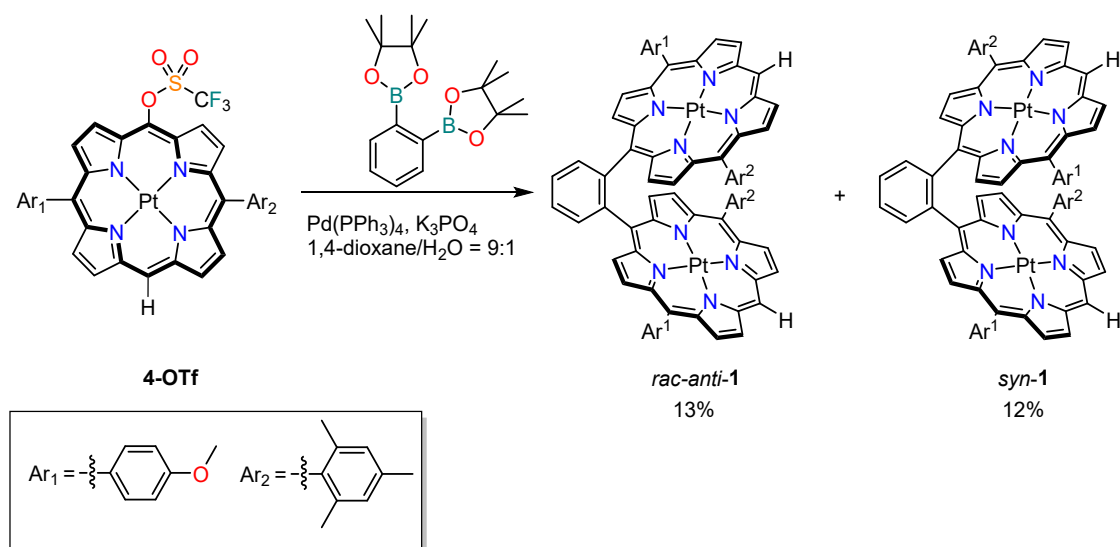

A mixture of **4-OTf** (35.1 mg, 0.040 mmol), 1,2-benzenediboronic acid bis(pinacol) ester (6.6 mg, 0.020 mmol), Pd(PPh<sub>3</sub>)<sub>4</sub> (9.3 mg, 0.080 mmol), and K<sub>3</sub>PO<sub>4</sub> (25.5 mg, 0.12 mmol) was placed in a round bottom flask equipped with a magnetic stirring bar. After degassing the reaction mixture several times, 1,4-dioxane/H<sub>2</sub>O = 10/1 (0.5 mL) were added, and the reaction was carried out at 100°C for 7 h with stirring. After the reaction mixture was cooled to room temperature, H<sub>2</sub>O was added to the reaction mixture. The organic layer was separated, and then aqueous layer was extracted three times with CH<sub>2</sub>Cl<sub>2</sub> and dried over MgSO<sub>4</sub>. MgSO<sub>4</sub> was removed by the filtration, and the solvent was removed by a rotary evaporator. The residue was purified by column chromatography on SiO<sub>2</sub> (CH<sub>2</sub>Cl<sub>2</sub>/hexane = 10/2 to 1/1 v/v as an eluent) and by gel permeation chromatography (CH<sub>2</sub>Cl<sub>2</sub> as an eluent) to afford a mixture of *rac-anti-1* and *syn-1* as a red solid. Further purification was carried out by chiral HPLC (CH<sub>2</sub>Cl<sub>2</sub>/hexane = 2/8) to afford *rac-anti-1* (4.0 mg, 0.0026 mmol, 13%) and *syn-1* (3.6 mg, 0.0024 mmol, 12%) as a red crystal. Optical resolution of *rac-anti-1* was carried out using chiral HPLC (*i*PrOH/hexane = 7/3 as an eluent).

$R_f = 0.71$  (CH<sub>2</sub>Cl<sub>2</sub> as an eluent).

*anti-1*

<sup>1</sup>H NMR (CDCl<sub>3</sub>, 500 MHz) δ -0.20 (s, 6 H), 1.49 (s, 6 H), 2.60 (s, 6 H), 4.10 (s, 6 H), 6.96 (s, 2 H), 7.03 (dd, *J* = 8.0, 2.9 Hz, 2 H), 7.06–7.12 (m, 6 H), 7.03 (dd, *J* = 8.0, 2.3 Hz, 2 H), 7.86 (d, *J* = 5.2 Hz, 2 H), 8.15 (d, *J* = 4.6 Hz, 2 H), 8.17 (d, *J* = 5.2 Hz, 2 H), 8.27 (dd, *J* = 5.4, 4.0 Hz, 2 H), 8.46 (d, *J* = 5.2 Hz, 2 H), 8.67 (d, *J* = 5.2 Hz, 2 H), 8.76 (d, *J* = 4.6 Hz, 2 H), 8.80 (dd, *J* = 5.4, 4.0 Hz, 2 H), 8.76 (d, *J* = 5.2 Hz, 2 H), 9.06 (d, *J* = 5.2 Hz, 2 H), 9.53 (s, 2 H) ppm.

<sup>13</sup>C NMR (CDCl<sub>3</sub>, 125 MHz) δ 19.6, 21.1, 21.4, 55.6, 106.6, 111.7, 112.0, 118.6, 119.9, 120.5, 127.3 (three pwaks), 127.4, 127.6, 129.0, 129.2, 130.0, 130.2, 130.5, 130.6, 131.4, 133.3, 133.4, 134.3, 134.7, 137.0, 137.3, 138.3, 139.1, 139.3, 139.4, 139.5, 139.6, 139.8, 140.0, 140.3, 144.7, 159.1 ppm.

IR(ATR):  $\tilde{\nu}$  = 3101, 3056, 2992, 2954, 2925, 2853, 1736, 1608, 1510, 1454, 1288, 1243, 1179, 1100, 1070, 1017, 694 cm<sup>-1</sup>.

HRMS (ESI<sup>+</sup>): *m/z* calcd for C<sub>78</sub>H<sub>58</sub>N<sub>8</sub>O<sub>2</sub><sup>195</sup>PtNa [M+Na]<sup>+</sup>: 1551.3867; found: 1551.3844.

*R*<sub>f</sub> = 0.71 (CH<sub>2</sub>Cl<sub>2</sub> as an eluent).



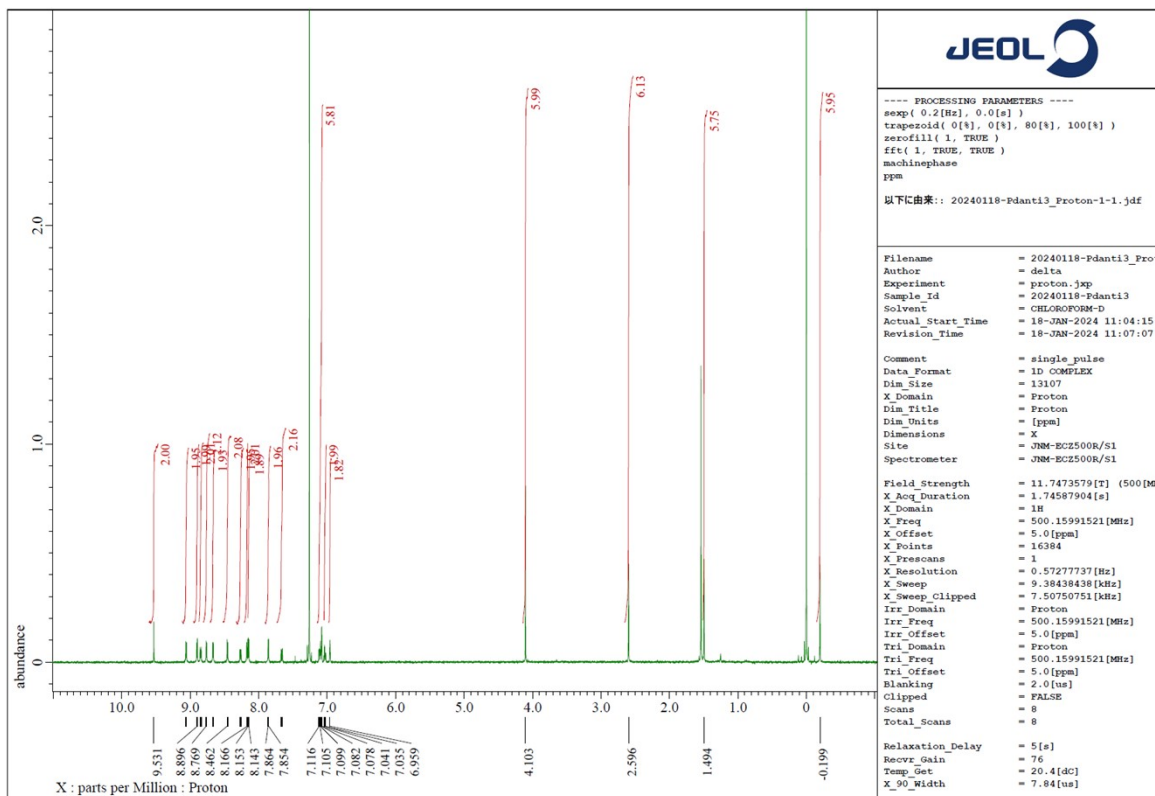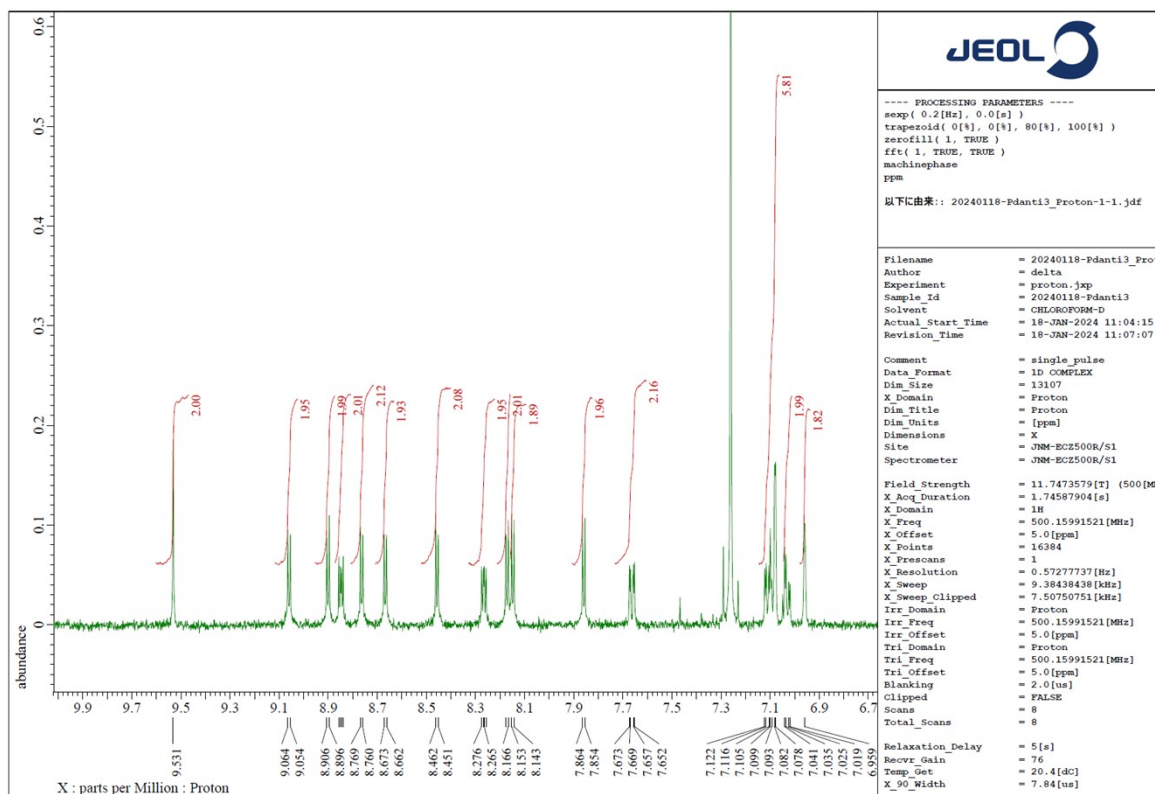

Figure S10. <sup>1</sup>H NMR spectra (CDCl<sub>3</sub>, 500 MHz) of *anti*-1.

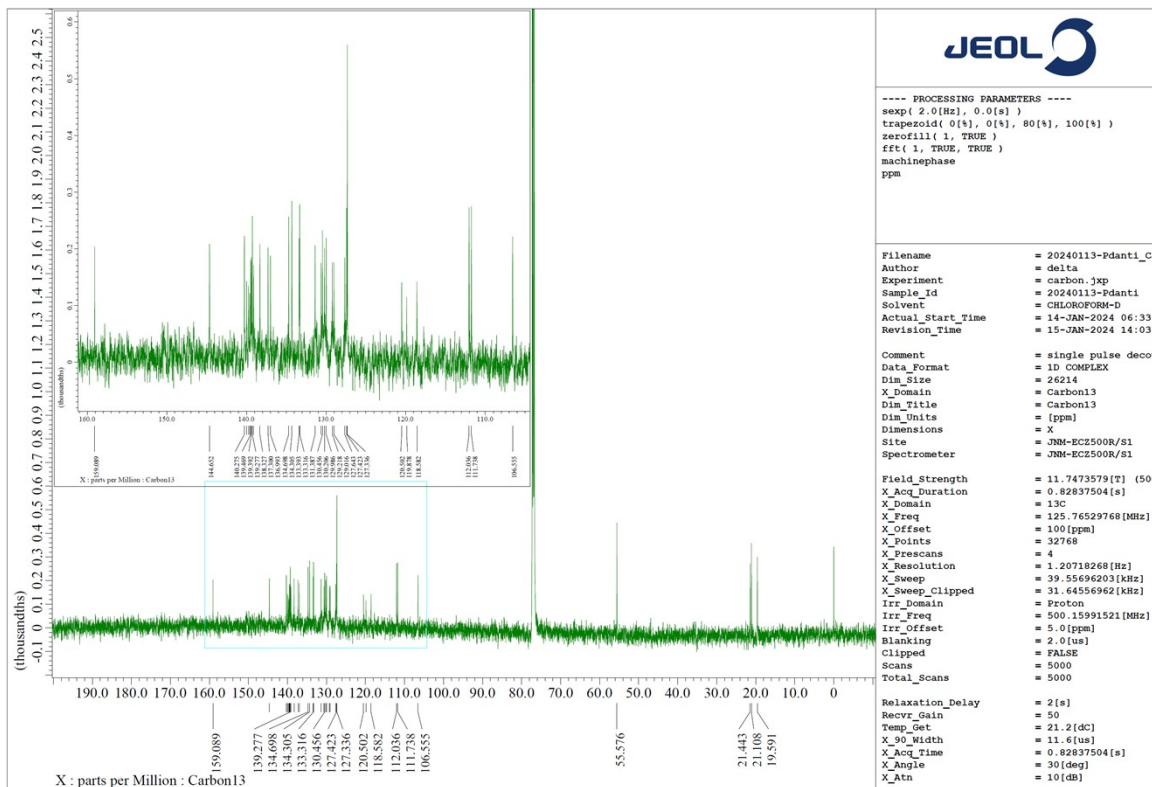

**Figure S11.**  $^{13}\text{C}\{^1\text{H}\}$  NMR spectrum ( $\text{CDCl}_3$ , 125 MHz) of *anti*-1.

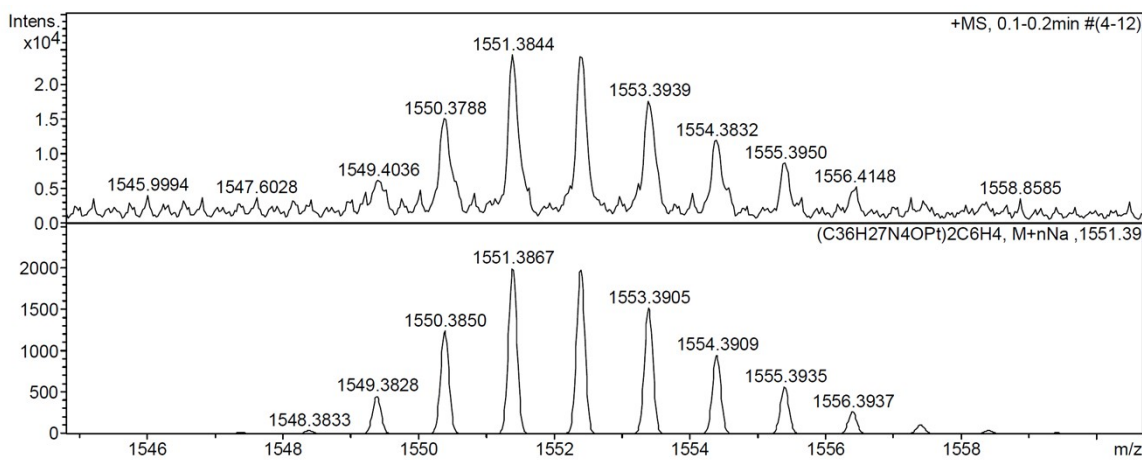

**Figure S12.** Mass spectra (ESI) and data of *anti*-1. Top: experimental spectrum and bottom: theoretical spectrum.

*syn-1*

$^1\text{H}$  NMR ( $\text{CDCl}_3$ , 500 MHz)  $\delta$  0.29 (s, 6 H), 1.43 (s, 6 H), 2.55 (s, 6 H), 4.06 (s, 6 H), 6.82 (dd,  $J = 8.0, 2.3$  Hz, 2 H), 6.88 (s, 2 H), 6.83 (dd,  $J = 8.0, 2.9$  Hz, 2 H), 7.05 (s, 2 H), 7.09 (dd,  $J = 8.6, 2.9$  Hz, 2 H), 7.65 (dd,  $J = 8.6, 2.3$  Hz, 2 H), 7.65 (dd,  $J = 8.6, 2.3$  Hz, 2 H), 7.87 (d,  $J = 5.2$  Hz, 2 H), 8.11 (d,  $J = 4.6$  Hz, 2 H), 8.22 (d,  $J = 4.6$  Hz, 2 H), 8.26 (dd,  $J = 5.7, 4.0$  Hz, 2 H), 8.44 (d,  $J = 4.6$  Hz, 2 H), 8.73 (d,  $J = 5.2$  Hz, 2 H), 8.75 (d,  $J = 5.2$  Hz, 2 H), 8.84 (dd,  $J = 5.7, 4.0$  Hz, 2 H), 8.97 (d,  $J = 5.2$  Hz, 2 H), 9.02 (d,  $J = 5.2$  Hz, 2 H), 9.56 (s, 2 H) ppm.

$^{13}\text{C}$  NMR ( $\text{CDCl}_3$ , 125 MHz)  $\delta$  20.4, 21.1, 21.4, 55.5, 106.6, 111.7, 112.0, 118.7, 120.2, 120.5, 127.2, 127.3, 127.5, 128.1, 129.09, 129.13, 129.9, 130.2, 130.6, 130.7, 131.2, 133.2, 134.3, 1134.4, 134.7, 136.9, 137.2, 138.5, 138.8, 139.2, 139.5 (two peaks), 139.6, 139.9, 140.1, 140.2, 140.3, 144.3, 159.0 ppm;

IR(ATR):  $\tilde{\nu} = 3067, 2996, 2958, 2925, 2868, 2853, 2826, 1743, 1728, 1608, 1510, 1454, 1243, 1108, 1021, 792, 694$   $\text{cm}^{-1}$ .

HRMS (ESI+):  $m/z$  calcd for  $\text{C}_{78}\text{H}_{58}\text{N}_8\text{O}_2^{195}\text{PtNa} [\text{M}+\text{Na}^+]^+$ : 1551.3867; found: 1551.3830.

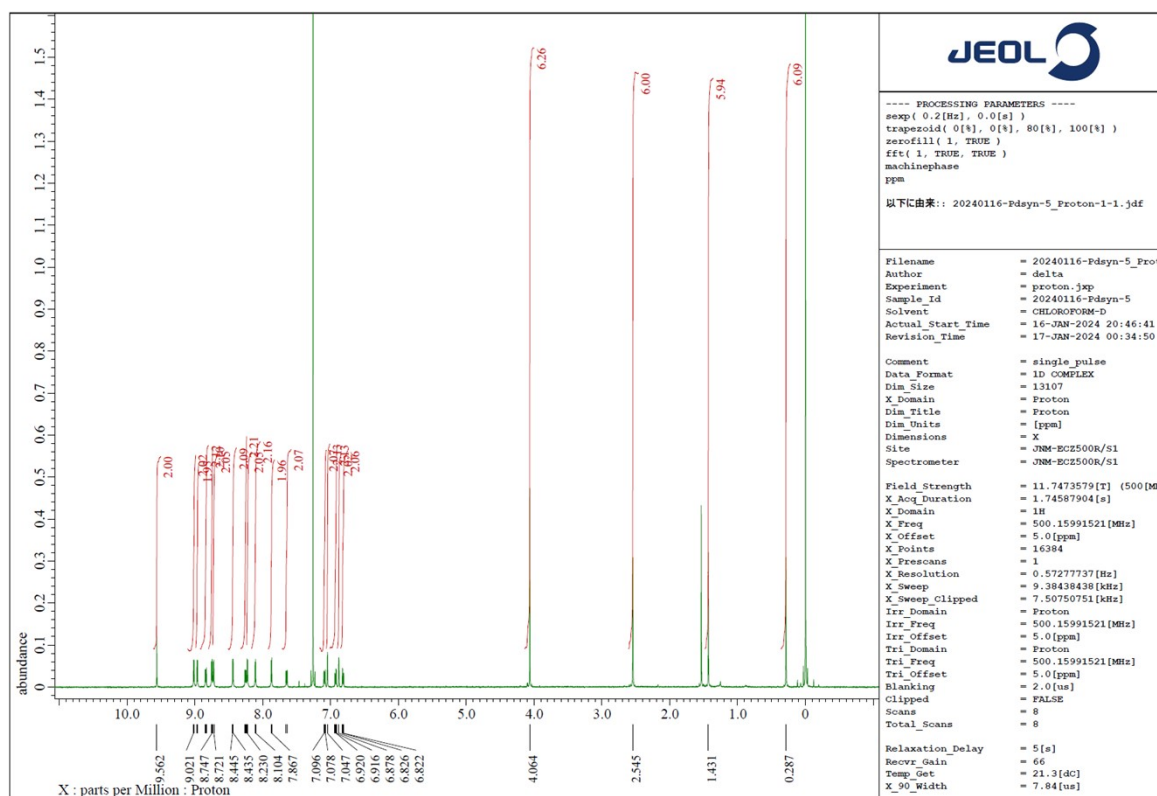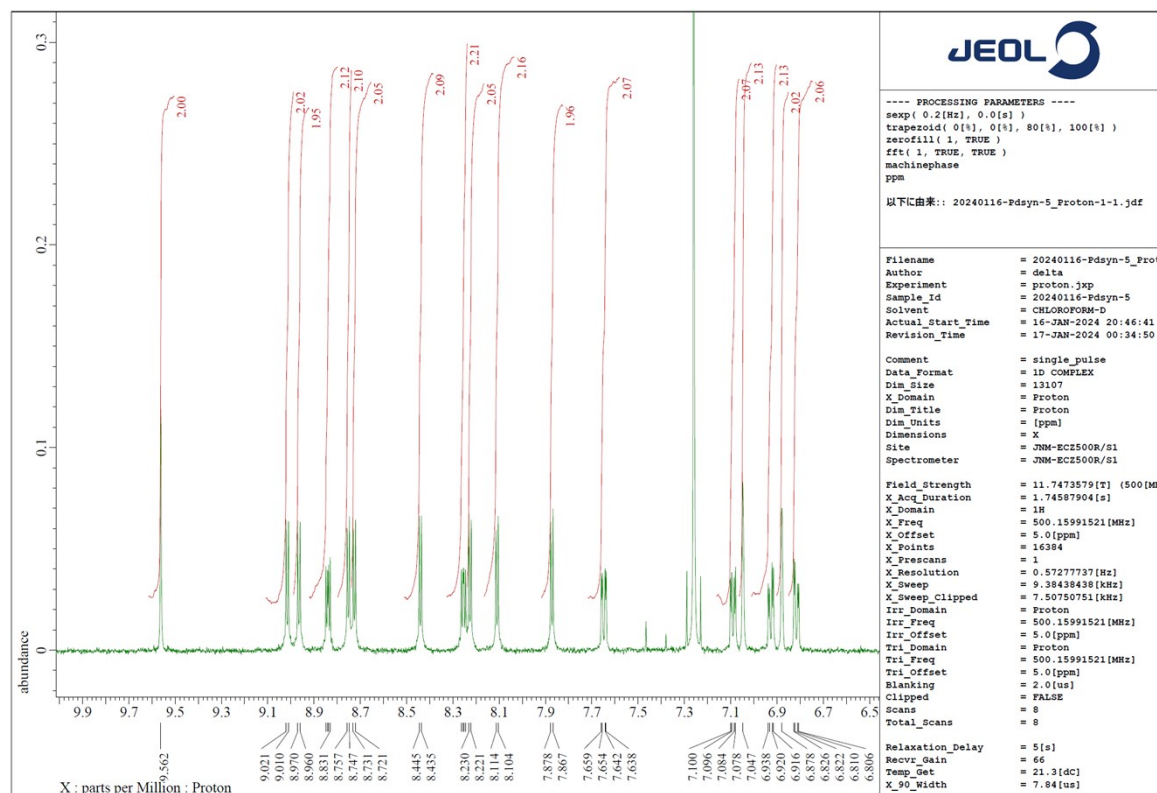

Figure S13.  $^1\text{H}$  NMR spectra ( $\text{CDCl}_3$ , 500 MHz) of *syn-1*.

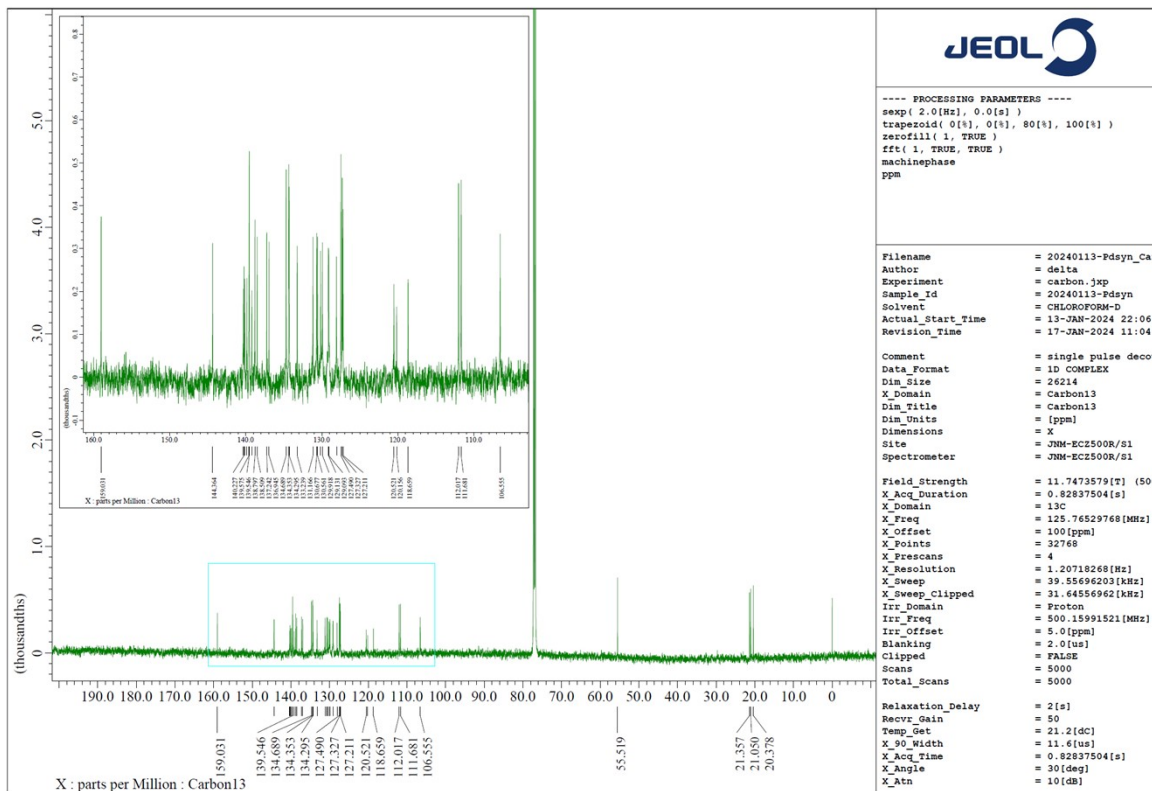

**Figure S14.**  $^{13}\text{C}\{^1\text{H}\}$  NMR spectrum ( $\text{CDCl}_3$ , 125 MHz) of *syn-1*.

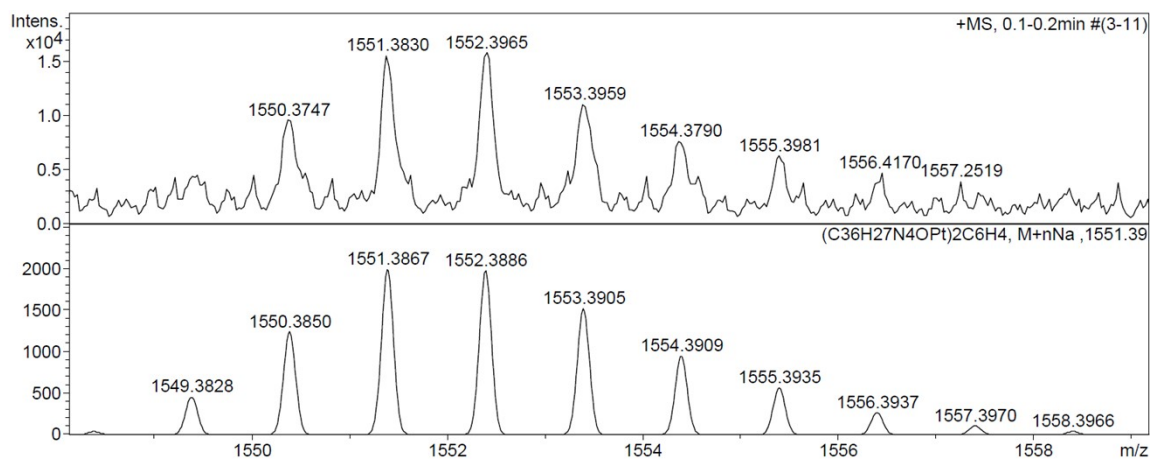

**Figure S15.** Mass spectra (ESI) and data of *syn-1*. Top: experimental spectrum and bottom: theoretical spectrum.

**Table S2.** Crystallographic data and structure refinements for **5**, *rac-anti-1*, (*R<sub>a</sub>R<sub>a</sub>*)-*anti-1*, and *syn-1*.

| Molecule                                                                   | <b>5</b>                                                         | <i>rac-anti-1</i>                                                             | ( <i>R<sub>a</sub>R<sub>a</sub></i> )- <i>anti-1</i> •4CHCl <sub>3</sub>                       | <i>syn-1</i> •0.5hexane•CHCl <sub>3</sub>                                                     |
|----------------------------------------------------------------------------|------------------------------------------------------------------|-------------------------------------------------------------------------------|------------------------------------------------------------------------------------------------|-----------------------------------------------------------------------------------------------|
| Formula                                                                    | C <sub>42</sub> H <sub>32</sub> N <sub>4</sub> O <sub>4</sub> Pt | C <sub>78</sub> H <sub>58</sub> N <sub>8</sub> O <sub>2</sub> Pt <sub>2</sub> | C <sub>82</sub> H <sub>62</sub> Cl <sub>12</sub> N <sub>8</sub> O <sub>2</sub> Pt <sub>2</sub> | C <sub>82</sub> H <sub>66</sub> Cl <sub>3</sub> N <sub>8</sub> O <sub>2</sub> Pt <sub>2</sub> |
| Formula weight                                                             | 803.80                                                           | 1529.50                                                                       | 2006.97                                                                                        | 1691.95                                                                                       |
| Temperature (K)                                                            | 150                                                              | 150                                                                           | 150                                                                                            | 150                                                                                           |
| Crystal color, habit                                                       | red, plate                                                       | orange, needle                                                                | orange, plate                                                                                  | red, plate                                                                                    |
| Crystal size, mm                                                           | 0.05 × 0.05 × 0.01                                               | 0.30 × 0.05 × 0.01                                                            | 0.50 × 0.30 × 0.20                                                                             | 0.05 × 0.02 × 0.02                                                                            |
| Crystal system                                                             | triclinic                                                        | triclinic                                                                     | orthorhombic                                                                                   | triclinic                                                                                     |
| Space group                                                                | <i>P</i> -1 (#2)                                                 | <i>P</i> -1 (#2)                                                              | <i>P</i> 2 <sub>1</sub> 2 <sub>1</sub> 2 (#18)                                                 | <i>P</i> -1 (#2)                                                                              |
| <i>a</i> , Å                                                               | 10.1467(5)                                                       | 11.5446(3)                                                                    | 19.3188(3)                                                                                     | 11.3270(2)                                                                                    |
| <i>b</i> , Å                                                               | 17.0883(8)                                                       | 17.1268(5)                                                                    | 19.1158(3)                                                                                     | 16.6957(2)                                                                                    |
| <i>c</i> , Å                                                               | 21.2534(7)                                                       | 17.3718(5)                                                                    | 10.62740(10)                                                                                   | 17.5885(3)                                                                                    |
| <i>α</i> , deg                                                             | 111.170(4)                                                       | 71.885(2)                                                                     | 90                                                                                             | 94.9910(10)                                                                                   |
| <i>β</i> , deg                                                             | 93.759(3)                                                        | 72.120(2)                                                                     | 90                                                                                             | 93.2430(10)                                                                                   |
| <i>γ</i> , deg                                                             | 106.032(4)                                                       | 77.570(2)                                                                     | 90                                                                                             | 90.9970(10)                                                                                   |
| <i>V</i> , Å <sup>3</sup>                                                  | 3246.1(3)                                                        | 3079.51(16)                                                                   | 3924.64(9)                                                                                     | 3307.45(9)                                                                                    |
| <i>Z</i> value                                                             | 4                                                                | 2                                                                             | 2                                                                                              | 2                                                                                             |
| <i>D</i> <sub>calcd</sub> , g cm <sup>-3</sup>                             | 1.645                                                            | 1.649                                                                         | 1.698                                                                                          | 1.699                                                                                         |
| <i>μ</i> (MoK $\alpha$ ), cm <sup>-1</sup>                                 | 43.64                                                            | 45.95                                                                         | 40.23                                                                                          | 18.736 (CuK $\alpha$ )                                                                        |
| <i>F</i> (000)                                                             | 1592.0                                                           | 1508.0                                                                        | 1972.0                                                                                         | 1674.0                                                                                        |
| 2 $\theta$ <sub>max</sub> , deg                                            | 52.044                                                           | 50.696                                                                        | 59.134                                                                                         | 152.796                                                                                       |
| No. of reflections measured                                                | 23877                                                            | 21430                                                                         | 38932                                                                                          | 46056                                                                                         |
| No. of observed reflections                                                | 12530                                                            | 11090                                                                         | 10138                                                                                          | 13284                                                                                         |
| No. of variables                                                           | 873                                                              | 863                                                                           | 526                                                                                            | 914                                                                                           |
| <i>R</i> <sub>1</sub> ( <i>I</i> > 2 $\sigma$ ( <i>I</i> )) <sup>[a]</sup> | 0.0517                                                           | 0.0576                                                                        | 0.0307                                                                                         | 0.0627                                                                                        |
| w <i>R</i> <sub>2</sub> (all reflns) <sup>[b]</sup>                        | 0.1212                                                           | 0.1429                                                                        | 0.0784                                                                                         | 0.1788                                                                                        |
| Goodness of fit                                                            | 1.063                                                            | 1.019                                                                         | 1.030                                                                                          | 1.098                                                                                         |
| Flack parameter                                                            | -                                                                | -                                                                             | -0.025(4)                                                                                      | -                                                                                             |
| Recrystallization solvent                                                  | CH <sub>2</sub> Cl <sub>2</sub> /MeOH                            | CH <sub>2</sub> Cl <sub>2</sub> /CH <sub>3</sub> CN                           | CHCl <sub>3</sub> /hexane                                                                      | CHCl <sub>3</sub> /hexane                                                                     |

[a]  $R_1 = \Sigma(|F_o| - |F_c|) / \Sigma(|F_o|)$ . [b]  $wR_2 = [\Sigma[w(F_o^2 - F_c^2)^2] / \Sigma w(F_o^2)^2]^{1/2}$ .

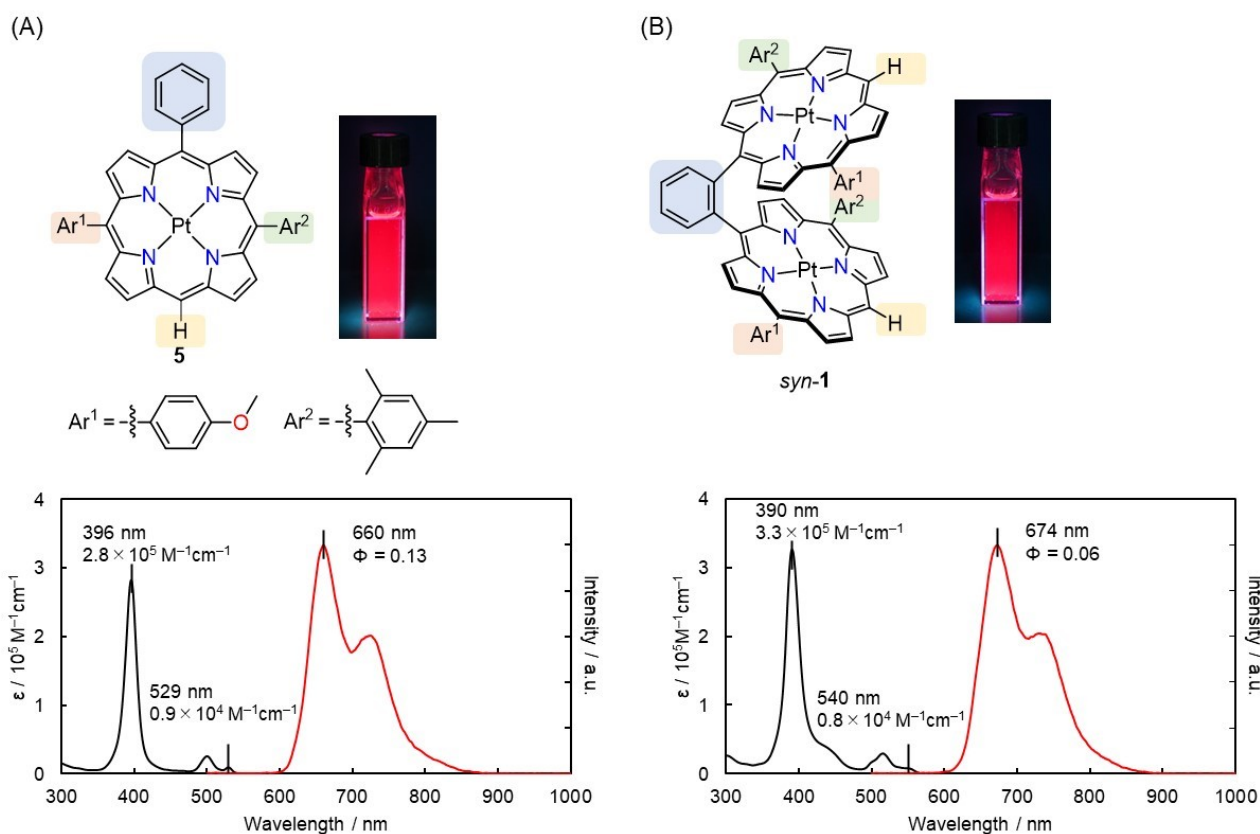

**Figure S16.** UV/vis (black line) and PL spectra (red line) of (A) **5** ( $1.0 \times 10^{-5}$  M) and (B) *syn-1* ( $5.0 \times 10^{-6}$  M) in toluene.

**Table S2.** Photophysical data for *anti-1*, *syn-1* and **5**.<sup>[a]</sup>

| Compound      | Soret band [nm]<br>( $\epsilon \times 10^5 / \text{M}^{-1}\text{cm}^{-1}$ ) | Q band [nm]<br>( $\epsilon \times 10^4 / \text{M}^{-1}\text{cm}^{-1}$ ) | $\lambda_{\text{lum,max}}$<br>[nm] | $\Phi^{[b]}$ | $\tau$ [ $\mu\text{s}$ ] ( $\chi^2$ ) | $k_r$<br>[ $10^3 \text{ s}^{-1}$ ] | $k_{\text{nr}}$<br>[ $10^4 \text{ s}^{-1}$ ] |
|---------------|-----------------------------------------------------------------------------|-------------------------------------------------------------------------|------------------------------------|--------------|---------------------------------------|------------------------------------|----------------------------------------------|
| <i>anti-1</i> | 387 (4.13)                                                                  | 509 (0.35), 542<br>(0.11)                                               | 679                                | 0.07         | 31.0 (1.0)                            | 2.3                                | 3.0                                          |
| <i>syn-1</i>  | 390 (3.26)                                                                  | 515 (0.30), 540<br>(sh, 0.08)                                           | 674                                | 0.06         | 8.8 (1.0)                             | 6.8                                | 10.7                                         |
| <b>5</b>      | 396 (2.81)                                                                  | 500 (0.25), 529<br>(0.09)                                               | 660                                | 0.13         | 42.5 (1.0)                            | 3.1                                | 2.0                                          |

[a] Emission spectra, quantum efficiencies, and emission decays were measured in degassed toluene solution ( $6.0 \times 10^{-6}$  M for **1** and  $1.0 \times 10^{-5}$  M for **5**) at room temperature. [b] Determined by the absolute method using an integrating sphere.

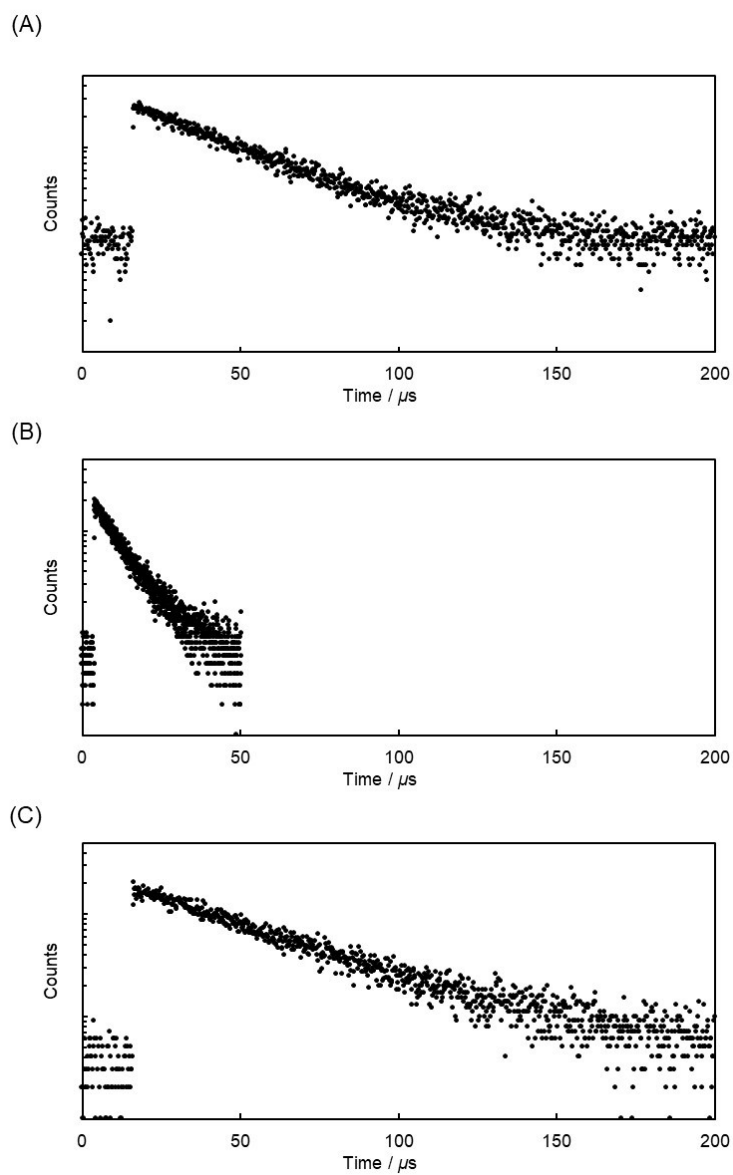

**Figure S17.** Emission decay curves for (A) *anti-1*, (B) *syn-1*, and (C) **5** in degassed toluene ( $5.0 \times 10^{-6}$  M for **1**, and  $1.0 \times 10^{-5}$  M for **5**) monitored at each  $\lambda_{\text{max}}$  ( $\lambda_{\text{ex}} = 405$  nm).



### Equations S(1)–S(3) for phosphorescent dissymmetry factor $g_{\text{phos}}$ .

$$g_{\text{phos},T} = C_1 g_{1,T} + C_2 g_{2,T} + C_3 g_{3,T} \#S(1)$$

$$C_i = \frac{k_i \rho_{i,T}}{(k_1 \rho_{1,T} + k_2 \rho_{2,T} + k_3 \rho_{3,T})} \#S(2)$$

$$\rho_{i,T} = \frac{\exp\left(-\frac{\Delta E_{i1}}{kT}\right)}{\left[\exp\left(-\frac{\Delta E_{31}}{kT}\right) + \exp\left(-\frac{\Delta E_{21}}{kT}\right) + 1\right]} \#S(3)$$

In these equations,  $g_{i,T}$  ( $i = 1, 2, 3$ ) is the dissymmetry factor of each triplet sublevel at temperature  $T$ ;  $C_i$  ( $i = 1, 2, 3$ ),  $k_i$  ( $i = 1, 2, 3$ ), and  $\rho_{i,T}$  are the coefficient, radiative rate constant, and Boltzmann population of each triplet sublevel, respectively;  $\Delta E_{12}$  represents the energy difference between  $T_{1,1}$  and  $T_{1,2}$ ;  $\Delta E_{13}$  represents the difference between  $T_{1,1}$  and  $T_{1,3}$ ;  $k$  is the Boltzmann constant.

### Equations S(4) for dissymmetry factor $g_{\text{lum}}$ .

$$g_{\text{lum}} = 4|\mu||m|\cos\theta/(|\mu|^2 + |m|^2) \#S(4)$$

To increase  $g_{\text{lum}}$  value, the transition containing small  $\mu$ , large  $m$  value, and  $\theta = 0$  or  $180^\circ$  are required.

a) *Circular Dichroism 2nd ed.* (Eds.: N. Berova, K. Nakanishi, R. W. Woody, Wiley-VCH: Toronto, 2000; b) J. P. Riehl, F. S. Richardson, *Chem. Rev.* **1986**, *86*, 1-16; c) J. P. Riehl, F. Muller, *Comprehensive Chiroptical Spectroscopy*, Wiley and Sons: New York, 2012.

**Table S3.** Major configurations and components of SOC transition for  $(R_a R_d)$ -*anti*-1 (The threshold of weight is 0.000050).

| State            | Weight           | Component         |
|------------------|------------------|-------------------|
| SOC <sub>1</sub> | 0.38502          | T <sub>1,1</sub>  |
|                  | 0.38502          | T <sub>1,-1</sub> |
|                  | 0.22741          | T <sub>1,0</sub>  |
|                  | 0.00094          | T <sub>2,0</sub>  |
|                  | 0.00018          | T <sub>2,-1</sub> |
|                  | 0.00014          | T <sub>9,-1</sub> |
|                  | 0.00018          | T <sub>2,1</sub>  |
|                  | 0.00014          | T <sub>9,1</sub>  |
|                  | 0.00012          | S <sub>3</sub>    |
|                  | 0.00011          | S <sub>120</sub>  |
| 0.00011          | T <sub>3,0</sub> |                   |
| SOC <sub>2</sub> | 0.72031          | T <sub>1,0</sub>  |
|                  | 0.13860          | T <sub>1,-1</sub> |
|                  | 0.13860          | T <sub>1,1</sub>  |
|                  | 0.00051          | T <sub>2,1</sub>  |
|                  | 0.00028          | T <sub>2,0</sub>  |
|                  | 0.00011          | T <sub>7,-1</sub> |
|                  | 0.00011          | T <sub>7,1</sub>  |
|                  | 0.00011          | T <sub>7,1</sub>  |
| SOC <sub>3</sub> | 0.47442          | T <sub>1,-1</sub> |
|                  | 0.47442          | T <sub>1,1</sub>  |
|                  | 0.04985          | T <sub>1,0</sub>  |
|                  | 0.00011          | T <sub>7,0</sub>  |
|                  | 0.00011          | T <sub>9,0</sub>  |
|                  | 0.00011          | T <sub>7,-1</sub> |
|                  | 0.00011          | T <sub>7,1</sub>  |
|                  | 0.00010          | T <sub>9,-1</sub> |
|                  | 0.00010          | T <sub>9,1</sub>  |

**Table S4.**  $k_r$ ,  $\Delta E_{li}$ , and  $\rho_{298K}$  of each SOCn for  $(R_a, R_a)$ -*anti*-1.

|                  | $k_r$ [s]         | $\Delta E_{li}$ [cm <sup>-1</sup> ] | $\rho_{298K}$ |
|------------------|-------------------|-------------------------------------|---------------|
| SOC <sub>1</sub> | $4.4 \times 10^2$ | -                                   | 0.333         |
| SOC <sub>2</sub> | $1.1 \times 10^2$ | 0.2                                 | 0.333         |
| SOC <sub>3</sub> | $4.7 \times 10^3$ | 2.1                                 | 0.331         |

**Table S5.** Cartesian coordinates of  $(R_a, R_a)$ -*anti-1* in the  $T_1$  state.

| atom | x         | y         | z         |   |           |           |           |
|------|-----------|-----------|-----------|---|-----------|-----------|-----------|
|      |           |           |           | C | 6.395052  | -1.9885   | -1.760868 |
| C    | -0.413774 | 0.428164  | 3.964999  | C | 7.684966  | -0.053811 | 0.350995  |
| C    | -0.818713 | 0.919553  | 5.217961  | C | 7.480168  | -1.713126 | 2.082298  |
| C    | -0.361281 | 0.359342  | 6.408695  | C | 5.798431  | -2.385088 | -2.916031 |
| C    | 0.520894  | -0.721026 | 6.366387  | C | 3.439686  | -2.923025 | -3.571757 |
| C    | 0.952953  | -1.207347 | 5.135078  | C | 1.154511  | -3.684921 | -4.287692 |
| C    | 0.50971   | -0.648964 | 3.922067  | C | -0.053722 | -3.840986 | -3.633199 |
| H    | -1.506129 | 1.760069  | 5.245745  | C | -2.46766  | -5.338235 | -1.48749  |
| H    | -0.693064 | 0.764075  | 7.360963  | C | -3.201193 | -3.095252 | -2.136763 |
| H    | 0.875403  | -1.180519 | 7.285019  | H | 7.44825   | -1.838014 | -1.57814  |
| H    | 1.647066  | -2.041521 | 5.097544  | H | 7.260735  | 0.502261  | -0.479788 |
| C    | 1.056255  | -1.201726 | 2.641841  | C | 8.981356  | 0.245862  | 0.776613  |
| C    | 2.461659  | -1.038082 | 2.41279   | C | 8.770774  | -1.435899 | 2.507039  |
| C    | 0.183715  | -1.889452 | 1.779673  | H | 6.900933  | -2.476301 | 2.593139  |
| N    | 3.139057  | -1.451863 | 1.285454  | H | 6.26425   | -2.618315 | -3.864962 |
| C    | 3.378459  | -0.443276 | 3.320098  | H | 3.802005  | -3.140642 | -4.572246 |
| N    | 0.475821  | -2.331026 | 0.518741  | H | 1.391464  | -3.917513 | -5.317818 |
| C    | -1.172975 | -2.264871 | 2.115532  | H | -0.984317 | -4.217217 | -4.032572 |
| C    | 4.469054  | -1.141854 | 1.47908   | C | -3.729936 | -5.827731 | -1.837319 |
| Pt   | 2.297232  | -2.221617 | -0.419299 | C | -1.412509 | -6.280459 | -0.951808 |
| C    | 4.630916  | -0.513502 | 2.738012  | C | -2.945304 | -1.613982 | -2.304428 |
| H    | 3.130548  | -0.021314 | 4.282036  | H | 9.540135  | 1.022202  | 0.266607  |
| C    | -0.674119 | -2.927737 | 0.016807  | C | 9.533535  | -0.450781 | 1.858148  |
| C    | -1.696206 | -2.901911 | 1.037582  | H | 9.215888  | -1.97022  | 3.340525  |
| H    | -1.648312 | -2.071672 | 3.064151  | H | -3.931387 | -6.890635 | -1.716533 |
| C    | 5.529913  | -1.351984 | 0.530609  | C | -4.734304 | -4.992606 | -2.337083 |
| N    | 4.13414   | -2.132585 | -1.350369 | H | -1.109595 | -6.009846 | 0.066748  |
| N    | 1.441816  | -2.986284 | -2.126425 | H | -0.506416 | -6.257663 | -1.568563 |
| H    | 5.560813  | -0.140924 | 3.139707  | H | -1.782702 | -7.310161 | -0.93125  |
| C    | -0.856571 | -3.411778 | -1.269613 | H | -2.049842 | -1.427338 | -2.908164 |
| H    | -2.687757 | -3.315688 | 0.924012  | H | -2.786053 | -1.113888 | -1.341658 |
| C    | 5.347334  | -1.800359 | -0.777414 | H | -3.792056 | -1.124583 | -2.795393 |
| C    | 6.910049  | -1.034859 | 0.985405  | O | 10.78553  | -0.248787 | 2.355641  |
| C    | 4.384401  | -2.487198 | -2.650912 | C | -6.078932 | -5.553636 | -2.739799 |
| C    | 2.071089  | -3.163391 | -3.337441 | C | 11.60369  | 0.735661  | 1.743245  |
| C    | 0.14383   | -3.404896 | -2.295416 | H | -6.849298 | -4.775358 | -2.755629 |
| C    | -2.205023 | -3.959647 | -1.636362 | H | -6.407315 | -6.342142 | -2.053116 |

|    |           |           |           |   |           |           |           |
|----|-----------|-----------|-----------|---|-----------|-----------|-----------|
| H  | -6.041699 | -5.996181 | -3.744406 | C | 3.074587  | 3.437015  | -2.036519 |
| H  | 12.5467   | 0.724925  | 2.292624  | H | -7.445344 | 1.734153  | -1.300921 |
| H  | 11.154    | 1.734822  | 1.814193  | H | -6.858152 | -0.946138 | -0.339072 |
| H  | 11.79585  | 0.500743  | 0.688015  | C | -8.664408 | -0.917266 | 0.822759  |
| C  | -0.99456  | 1.054942  | 2.727936  | C | -8.793338 | 0.814236  | 2.509808  |
| C  | -2.369131 | 0.873033  | 2.500479  | H | -7.104288 | 2.127661  | 2.646496  |
| C  | -0.150851 | 1.806064  | 1.898415  | H | -6.397121 | 2.973672  | -3.455445 |
| N  | -3.083417 | 1.33104   | 1.413978  | H | -3.998099 | 3.797911  | -4.113597 |
| C  | -3.26689  | 0.16253   | 3.38192   | H | -1.652972 | 4.743835  | -4.817361 |
| N  | -0.487683 | 2.368489  | 0.687221  | H | 0.768999  | 4.867418  | -3.624395 |
| C  | 1.221635  | 2.133731  | 2.205434  | C | 3.661333  | 6.095506  | -1.390643 |
| C  | -4.393934 | 0.935746  | 1.58612   | C | 1.396555  | 6.447403  | -0.343135 |
| Pt | -2.32357  | 2.328319  | -0.194005 | C | 2.791028  | 1.99423   | -2.391656 |
| C  | -4.505486 | 0.207058  | 2.825565  | H | -9.080297 | -1.773416 | 0.303855  |
| H  | -2.98172  | -0.307256 | 4.311123  | C | -9.36804  | -0.285932 | 1.855138  |
| C  | 0.639401  | 3.000777  | 0.205033  | H | -9.35405  | 1.295258  | 3.305257  |
| C  | 1.705771  | 2.863972  | 1.167878  | H | 3.886576  | 7.128778  | -1.132677 |
| H  | 1.741424  | 1.839966  | 3.103678  | C | 4.628533  | 5.327523  | -2.04602  |
| C  | -5.459502 | 1.15091   | 0.699549  | H | 1.099346  | 6.017679  | 0.620672  |
| N  | -4.169512 | 2.295623  | -1.07207  | H | 0.479195  | 6.562729  | -0.932519 |
| N  | -1.556922 | 3.332481  | -1.799882 | H | 1.805607  | 7.445362  | -0.156866 |
| H  | -5.41852  | -0.225827 | 3.206216  | H | 1.893834  | 1.900599  | -3.014341 |
| C  | 0.770802  | 3.651765  | -1.026775 | H | 2.619231  | 1.380143  | -1.499621 |
| H  | 2.697056  | 3.276611  | 1.049043  | H | 3.630113  | 1.555779  | -2.940644 |
| C  | -5.334159 | 1.788179  | -0.54121  | O | -10.60439 | -0.658917 | 2.295793  |
| C  | -6.813898 | 0.652331  | 1.099461  | C | 5.963583  | 5.923583  | -2.429933 |
| C  | -4.482886 | 2.821119  | -2.303345 | C | -11.23502 | -1.764656 | 1.67083   |
| C  | -2.24721  | 3.682858  | -2.936155 | H | 6.736116  | 5.15224   | -2.519346 |
| C  | -0.265811 | 3.781234  | -1.958205 | H | 6.302315  | 6.658884  | -1.691547 |
| C  | 2.112315  | 4.233589  | -1.380119 | H | 5.906502  | 6.440286  | -3.397683 |
| C  | -6.417488 | 2.01758   | -1.47222  | H | -12.19792 | -1.882811 | 2.171253  |
| C  | -7.400742 | -0.44389  | 0.457221  | H | -10.64903 | -2.685655 | 1.79113   |
| C  | -7.53649  | 1.271929  | 2.135239  | H | -11.40293 | -1.582722 | 0.60085   |
| C  | -5.889193 | 2.643327  | -2.558317 | C | -4.449026 | -3.632001 | -2.476426 |
| C  | -3.594765 | 3.445859  | -3.168877 | H | -5.216127 | -2.96407  | -2.864116 |
| C  | -1.361737 | 4.36403   | -3.846367 | C | 4.315206  | 4.001528  | -2.356194 |
| C  | -0.142597 | 4.427566  | -3.246052 | H | 5.055554  | 3.384199  | -2.861721 |
| C  | 2.407695  | 5.574419  | -1.053312 |   |           |           |           |
